# Supplementary material for: Hierarchical architecture of neo-sex chromosomes and accelerated adaptive evolution in tortricid moths
Source: HighWire-hosted journal article supplement (doi:10.1101/gr.279569.124), 2025-01-01
Supplement: Supplemental_Tables.xlsx [file Supplemental_Tables.xlsx]

## Sheet: TableS1
Supplementa Table S1 BUSCO analyses of genome annotation
Species	Completeness
Grapholita molesta	C:96.9%[S:96.1%,D:0.8%],F:0.9%,M:2.2%,n:5286
Grapholita dimorpha	C:95.7%[S:94.9%,D:0.8%],F:1.3%,M:3.0%,n:5286
Cydia pomonella	C:96.8%[S:95.9%,D:0.9%],F:0.7%,M:2.5%,n:5286
Lathronympha_strigana	C:96.2%[S:94.9%,D:1.3%],F:0.6%,M:3.2%,n:5286
Leguminivora_glycinivorella	C:85.1%[S:82.9%,D:2.2%],F:2.6%,M:12.3%,n:5286
Pammene_fasciana	C:95.9%[S:94.6%,D:1.3%],F:0.5%,M:3.6%,n:5286
Epiblema_foenella	C:96.0%[S:94.9%,D:1.1%],F:0.6%,M:3.4%,n:5286
Notocelia_uddmanniana	C:96.1%[S:95.0%,D:1.1%],F:0.3%,M:3.6%,n:5286
Apotomis_betuletana	C:96.0%[S:94.8%,D:1.2%],F:0.6%,M:3.4%,n:5286
Eudemis profundana	C:96.0%[S:94.6%,D:1.4%],F:0.5%,M:3.5%,n:5286
Hedya salicella	C:96.1%[S:94.9%,D:1.2%],F:0.4%,M:3.5%,n:5286
Choristoneura fumiferana	C:92.9%[S:87.0%,D:5.9%],F:1.4%,M:5.7%,n:5286
Pandemis heparana	C:96.4%[S:95.3%,D:1.1%],F:0.4%,M:3.2%,n:5286
Archips xylosteana	C:96.6%[S:95.6%,D:1.0%],F:0.3%,M:3.1%,n:5286
Clepsis dumicolana	C:95.4%[S:94.2%,D:1.2%],F:0.7%,M:3.9%,n:5286
Acleris emargana	C:95.4%[S:94.2%,D:1.2%],F:0.6%,M:4.0%,n:5286
Tortrix viridana	C:96.1%[S:95.0%,D:1.1%],F:0.8%,M:3.1%,n:5286
Cenopis cana	C:96.1%[S:95.0%,D:1.1%],F:0.4%,M:3.5%,n:5286
Ditula angustiorana	C:96.6%[S:95.4%,D:1.2%],F:0.5%,M:2.9%,n:5286
Tortricodes alternella	C:96.3%[S:95.2%,D:1.1%],F:0.4%,M:3.3%,n:5286
Polylopha cassiicola	C:96.4%[S:95.5%,D:0.9%],F:0.5%,M:3.1%,n:5286
Emmelina monodactyla	C:94.7%[S:93.2%,D:1.5%],F:0.7%,M:4.6%,n:5286
Pectinophora gossypiella	C:96.5%[S:94.8%,D:1.7%],F:0.5%,M:3.0%,n:5286
Plutella xylostella	C:98.8%[S:98.1%,D:0.7%],F:0.1%,M:1.1%,n:5286
Carposina sasakii	C:93.1%[S:89.1%,D:4.0%],F:1.6%,M:5.3%,n:5286
Sesia bembeciformis	C:96.5%[S:95.3%,D:1.2%],F:0.3%,M:3.2%,n:5286
Zeuzera pyrina	C:96.7%[S:95.6%,D:1.1%],F:0.5%,M:2.8%,n:5286

## Sheet: TableS2
Supplementa Table S2 Data source of this study
species	Genome assembly	Transcriptome	Hi-C
Grapholita molesta	New version	pooled eggs, 1 male pupa, 1 male adult, 1 female adult, SRR800384	pooled larvas
Grapholita dimorpha	First published	1 larva, 1 pupaa, 1 adult	1 larva
Grapholita funebrana
Cydia pomonella	New version	SRR8479437	Wan et. al., 2019
Lathronympha_strigana	GCA_949128165.1
Leguminivora_glycinivorella	GCA_023078275.1
Pammene_fasciana	GCA_911728535.1
Epiblema_foenella	GCA_963556455.1
Notocelia_uddmanniana	GCA_905163555.1
Apotomis_betuletana	GCA_932273695.1
Eudemis profundana	GCA_947034925.1
Hedya salicella	GCA_905404275.2
Choristoneura fumiferana	GCA_025370935.1		SRR16328240
Pandemis heparana	GCA_963854515.1
Archips xylosteana	GCA_947563465.1
Clepsis dumicolana	GCA_963691665.1
Acleris emargana	GCA_927399475.2
Tortrix viridana	GCA_963241965.1
Cenopis cana	GCA_951800055.1
Ditula angustiorana	GCA_963691745.1
Tortricodes alternella	GCA_947859335.1
Polylopha cassiicola	GCA_038024825.1		SRR27332171
Emmelina monodactyla	GCA_916618145.1
Pectinophora gossypiella	GCA_024362695.1
Plutella xylostella	GCA_932276165.1
Carposina sasakii	GCA_014607495.2
Sesia bembeciformis	GCA_943735995.1	ERX9660763	ERR9710923
Zeuzera pyrina	GCA_907165235.1		ERR6054721
Wan et al. (2019). A chromosome-level genome assembly of Cydia pomonella provides insights into chemical ecology and insecticide resistance. Nature Communications, 10(1), 4237

## Sheet: TableS3
Supplementa Table S3 Sample information of individuals used for sequencing
Species	Population	Sample size	Coordinate	Sources
Grapholita molesta	SCCD	11	E104.32, N30.54	Cao et al., 2022
Grapholita molesta	SCNC	16	E105.96,N31.15	Newly generated
Grapholita molesta	YNHH	11	E102.42, N23.39	Cao et al., 2022
Grapholita molesta	BJPG	10	E117, N23.39	Cao et al., 2022
Grapholita molesta	BJPG	2	E117, N40	Newly generated
Grapholita molesta	HBYC	7	E111, N31	Newly generated
Grapholita dimorpha	HBYC	17	E111, N31	Newly generated
Grapholita funebrana	SXTY	1	E112, N37.5	Newly generated
Cydia pomonella	GSWW	1	E103, N38	Newly generated
Cao L-J, Song W, Chen J-C, Fan X-L, Hoffmann AA, Wei S-J. 2022. Population genomic signatures of the oriental fruit moth related to the Pleistocene climates. Communciations Biol 5: 142.

## Sheet: TableS4
Supplementa Table S4 Single-copy orthologs under positive selection (PLRT < 0.01) among 26 species. PLRT was derived from branch-site model and indicats the possibility under positive selection in Tortricidae
Merain element	Positation	PLRT	Gene	Gene destription
M17	10335084	0	ABCC4	ABC transporter
M17	6361053	0	HERC2	Mouse development and cellular proliferation protein Cullin-7
M17	18617280	0	CTL9	C-type lectin (CTL) or carbohydrate-recognition domain (CRD)
M20	3113626	0	PsGEF	Domain of unknown function (DUF4799)
M20	4329052	0	UBR4	Zinc ion binding
MZ	34074697	0	epi-1	Laminin Domain II
MZ	31884129	0	DNAH5	Dynein heavy chain, N-terminal region 1
M7	16655549	0	NPLOC4	Nuclear pore localisation protein NPL4
M7	10214160	0	ASPM	Abnormal spindle-like microcephaly-assoc'd, ASPM-SPD-2-Hydin
M7	3082143	0	RPTOR	Raptor N-terminal CASPase like domain
M22	6521533	0	UBR1	Zinc ion binding
M22	4089590	0	msps	TOG
M15	15411373	0	MAP1B	Microtubule binding
M15	12828988	0	DYNC1H1	dynein heavy chain
M15	7057231	0	IKBKAP	IKI3 family
M11	792340	0	INTS1	Protein of unknown function (DUF3677)
M11	1185642	0	KIF16B	Belongs to the TRAFAC class myosin-kinesin ATPase superfamily. Kinesin family
M11	1147231	0	PDCD11	Ribosomal protein S1-like RNA-binding domain
M11	8646090	0	Myo22	MyTH4 domain
M11	11376380	0	BIRC6	Belongs to the ubiquitin-conjugating enzyme family
M11	12981952	0	FERMT2	Band 4.1 homologues
M11	10845201	0	PPM1B	Protein serine/threonine phosphatase 2C, C-terminal domain
M5M13	1878321	0	NOC3L	Nucleolar complex-associated protein
M5M13	25260419	0	RSF1	Zinc ion binding
M19	4287153	0	yl	Low-density lipoprotein receptor domain class A
M19	5121811	0	SLC9C1	potassium:proton antiporter activity
M19	10397805	0	OPLAH	Hydantoinase B/oxoprolinase
M28	10939273	0	Vg	Lipoprotein N-terminal Domain
M28	7401180	0	unc-22	Immunoglobulin
M28	2310141	0	SEC24C	Sec23/Sec24 zinc finger
M27	10638386	0	EHBP1	DUF3585
M31	4790345	0	KDM4B	Metal ion binding
M31	154791	0	SPTBN5	Spectrin repeat
M30	5798851	0	NUP98	Nucleoporin autopeptidase
M30	2466065	0	MAN2B1	carbohydrate binding
M18M26	15405863	0	CROCC	Ciliary rootlet component, centrosome cohesion
M18M26	1527134	0	APC2	Beta-catenin binding
M18M26	21262607	0	SMC4	SMC proteins Flexible Hinge Domain
M18M26	13559083	0	CPSF1	Mono-functional DNA-alkylating methyl methanesulfonate N-term
M8	1757603	0	FAT1	Cadherin repeats.
M8	13482497	0	lva	-
M8	2668843	0	PIK3C2A	PI3-kinase family, Ras-binding domain
M8	3964809	0	WDR19	WD domain, G-beta repeat
M8	7803391	0	ABTB2	Protein heterodimerization activity
M8	8299731	0	-	Protein tyrosine phosphatase activity
M2	21253691	0	GSAP	gamma-Secretase-activating protein C-term
M2	21318870	0	SMC6
M2	20409769	0	Unc-89	Immunoglobulin
M1	20850074	0	CFAP43	-
M1	2521702	0	DOCK6	Dock homology region 2
M12	1114719	0	GCN1L1	translational activator
M12	9097002	0	Cht3	Glyco_18
M12	8781069	0	Sur	ABC transporter transmembrane region
M12	16298565	0
M12	13205953	0	-	Kelch
M3	4964050	0	-	Vacuolar sorting-associated protein 13, N-terminal
M3	11390995	0	-	-
M9	10348505	0	DOCK3	Guanyl-nucleotide exchange factor activity
M9	10610357	0	-	GXGXG motif
M17	11994084	1e-09	ECT2	Guanine nucleotide exchange factor for Rho/Rac/Cdc42-like GTPases
M16	16832805	1e-09	CTSE	Xylanase inhibitor C-terminal
M15	2029445	1e-09	CACNA2D4	Calcium channel
M5M13	13144957	1e-09	Trn-SR	Ran GTPase binding. It is involved in the biological process described with intracellular protein transport
M14	3571414	1e-09
M28	6074937	1e-09	-	It is involved in the biological process described with signal transduction
M29	5420524	1e-09	-	Trypsin
M8	19139147	1e-09	SREBF2	protein dimerization activity
M2	18141714	1e-09	EIF2B4	translation initiation factor activity
M1	1652415	1e-09	LAMA2	Laminin B (Domain IV)
M9	13324873	1e-09	KIAA0368	Proteasome stabiliser
M7	16607022	2e-09	WIPI2	WD40 repeats
M14	8140890	2e-09	NRD1	Belongs to the peptidase M16 family
M29	7795160	2e-09	SIK3	Kinase associated domain 1
M18M26	182877	2e-09	-	Cadherin repeats.
M9	10071705	2e-09	-	WD domain, G-beta repeat
M4	11313416	3e-09	-	beta-acetyl hexosaminidase like
M5M13	10067708	3e-09	UNC79	Cation-channel complex subunit UNC-79
M18M26	2096593	3e-09	-	Cadherin repeats.
M22	16881227	4e-09	-	Immunoglobulin like
M14	1417474	4e-09	LIMK1	Zinc-binding domain present in Lin-11, Isl-1, Mec-3.
M2	18695807	4e-09	ACADVL	Acyl-CoA dehydrogenase, N-terminal domain
M9	18136157	4e-09	-	-
M5M13	23687302	5e-09	FAT4	Cadherin repeats.
M24	2465495	5e-09	-	Electron transfer DM13
M23	5179623	6e-09	POLRMT	DNA-dependent RNA polymerase
M7	10106777	7e-09	WDR3	WD domain, G-beta repeat
M14	2802265	7e-09	CPD	Zn_pept
M28	4156536	8e-09
M1	17269138	8e-09	POGZ	Metal ion binding
M14	2290488	1e-08	ATXN2	LsmAD
M6	7543452	1.2e-08	GART	It is involved in the biological process described with purine nucleobase biosynthetic process
M9	14300502	1.7e-08	INTS5	Integrator complex subunit 5 C-terminus
M5M13	22089496	2.1e-08	WDR26	WD domain, G-beta repeat
M19	419498	2.4e-08	VPS35	Vacuolar protein sorting-associated protein 35
M11	7311091	3e-08	DIEXF	Utp25, U3 small nucleolar RNA-associated SSU processome protein 25
M28	6204597	3.6e-08	-	E1-E2 ATPase
M20	2064318	4.2e-08	CRB2	Human growth factor-like EGF
M24	1903984	4.4e-08	CLINT1	Telomere length regulation protein
M25	9240733	4.9e-08	NEO1	Neogenin C-terminus
M1	10108774	6.1e-08	WDR35	Anaphase-promoting complex subunit 4 WD40 domain
M7	16519612	6.3e-08	-	Sugar (and other) transporter
M5M13	6040415	6.3e-08	MSH6	Component of the post-replicative DNA mismatch repair system (MMR)
M14	1297638	6.7e-08	RPAP1	RPAP1-like, N-terminal
M29	8141739	7.7e-08	USP2	Belongs to the peptidase C19 family
M29	2743728	8.1e-08	TOPBP1	twin BRCT domain
M22	6394744	1.06e-07	CTSO	Papain family cysteine protease
M23	3747560	1.27e-07	SEC31A	Vesicle associated protein
M14	3345467	1.31e-07	-	It is involved in the biological process described with
M17	12912052	1.32e-07	-	WWE domain
M14	13756318	1.32e-07	PHF12	PHD finger protein 12 MRG binding domain
M17	16436567	1.42e-07	PAXBP1	DNA binding. It is involved in the biological process described with
M23	1959889	1.49e-07	-	MYND finger
M23	15102291	1.54e-07	GBF1	Guanine nucleotide exchange factor in Golgi transport N-terminal
M2	21124349	1.62e-07	NBAS	Neuroblastoma-amplified sequence, N terminal
M18M26	18751173	1.75e-07	inaD	protein C-terminus binding
M15	13772530	1.76e-07	TP53BP1	ubiquitin modification-dependent histone binding
M5M13	8425805	1.82e-07	ASCC3	Sec63 Brl domain
M8	7842158	1.95e-07	-	Belongs to the CDP-alcohol phosphatidyltransferase class-I family
M11	1254751	1.96e-07	BAZ1A	Zinc ion binding
M1	3065779	2.27e-07	MED15	ARC105 or Med15 subunit of Mediator complex non-fungal
M29	6028063	2.38e-07	ARHGAP32	GTPase-activator protein for Rho-like GTPases
MZ	20980018	2.39e-07	MYCBP2	PHR domain
M23	5992806	2.43e-07	DDX46	helicase superfamily c-terminal domain
M14	14129938	2.63e-07	-	CRAL/TRIO domain
M4	14365767	2.83e-07	CC2D2A	protein localization to ciliary transition zone
M19	5435016	2.9e-07	PIK3R4	It is involved in the biological process described with protein phosphorylation
M14	8675396	3.11e-07	ALDH1L2	oxidoreductase activity, acting on the aldehyde or oxo group of donors, NAD or NADP as acceptor. It is involved in the biological process described with oxidation-reduction process
M7	16769723	3.18e-07	PROM1	Prominin
M2	19647560	3.37e-07	-	Serine/Threonine protein kinases, catalytic domain
M16	8203697	3.4e-07	CCDC88A	HOOK protein
M12	8454745	3.43e-07	-	helix loop helix domain
M27	24301	3.5e-07	RBM25	PWI, domain in splicing factors
M12	9043107	3.83e-07	-	Serine aminopeptidase, S33
M20	2712548	4.05e-07	XPNPEP3	Aminopeptidase P, N-terminal domain
M1	10707155	4.47e-07	ATM	FATC
M14	6234321	4.94e-07	DHX37	Helicase associated domain (HA2) Add an annotation
M22	15194591	5.22e-07	ARHGAP6	It is involved in the biological process described with signal transduction
M15	259190	5.23e-07	DAZAP1	RNA recognition motif
M14	4850882	5.39e-07	BRIP1	HELICc2
M4	14416198	6.5e-07	RNPC3	RNA recognition motif
M29	7613375	6.61e-07	TBC1D4	Domain of unknown function (DUF3350)
M29	7259132	6.7e-07	SCRB5	CD36 family
M11	2514316	7.33e-07	EIF2AK4	Histidyl-tRNA synthetase
M17	8672125	7.34e-07	GABBR1	7 transmembrane sweet-taste receptor of 3 GCPR
M31	7042932	7.61e-07	-	-
M4	14922152	8.44e-07	KIAA1429	Virilizer, N-terminal
M11	7647356	8.55e-07	-	Beta-mannosidase activity. It is involved in the biological process described with mannan catabolic process
M7	6233991	8.67e-07	-	-
M8	10171713	8.87e-07	KDR	Tyrosine kinase, catalytic domain
M29	88710	9.03e-07	-	protein serine/threonine kinase activity
M12	17128290	9.14e-07	ITGAV	Integrin alpha
M12	2210430	9.26e-07	TXNRD2	Pyridine nucleotide-disulphide oxidoreductase, dimerisation domain
M8	8387599	9.34e-07	EIF4G2	eIF4-gamma/eIF5/eIF2-epsilon
M18M26	2287933	9.35e-07
M25	2437590	9.62e-07	PSMB4	Proteasome subunit
M22	6409806	1.052e-06	SBF1	Myotubularin protein
M15	4445295	1.072e-06	FBN1	TB domain
M21	6948227	1.144e-06	PHF10	DNA binding domain with preference for A/T rich regions
M18M26	2587229	1.147e-06	ACVR2A	Protein tyrosine kinase
M1	18772427	1.199e-06	CycB3	Cyclin_C
M4	9884167	1.248e-06	SETX	Forkhead associated domain
M28	1157764	1.277e-06	-	-
M22	1570535	1.425e-06	OGFOD1	Oxoglutarate and iron-dependent oxygenase degradation C-term
M7	4867552	1.453e-06	TMC5	TMC domain
M11	3454140	1.491e-06	MAN2A1	Alpha mannosidase, middle domain
M31	4634419	1.511e-06	DPP8	X-Pro dipeptidyl-peptidase (S15 family)
M5M13	17183455	1.526e-06	WDFY3	Metal ion binding
M1	6830217	1.617e-06	-	Leucine Rich Repeat
M9	18407103	1.723e-06	PUS7	tRNA pseudouridine synthase D (TruD)
M4	1330261	1.848e-06	-	Ankyrin repeat
M29	3279017	1.853e-06	-	-
M16	16965142	1.86e-06	STXBP5	It is involved in the biological process described with vesicle-mediated transport
M14	3901861	1.918e-06	EIF3A	RNA-binding component of the eukaryotic translation initiation factor 3 (eIF-3) complex, which is involved in protein synthesis of a specialized repertoire of mRNAs and, together with other initiation factors, stimulates binding of mRNA and methionyl-tRNAi to the 40S ribosome. The eIF-3 complex specifically targets and initiates translation of a subset of mRNAs involved in cell proliferation
M9	11119956	1.923e-06	IFRD1	Interferon-related protein conserved region
M11	1291010	2.189e-06	POLR3A	RNA polymerase Rpb1, domain 1
M7	14364602	2.412e-06	DPYD	Involved in pyrimidine base degradation. Catalyzes the reduction of uracil and thymine
M17	11190571	2.489e-06	-	Immunoglobulin
M18M26	23936742	2.91e-06	-	-
M16	13607734	3.195e-06	KANSL1	PEHE
M3	2134021	3.343e-06	-	ERAP1-like C-terminal domain
M30	718004	3.428e-06	RBM48	nucleotide binding
M2	1375888	3.443e-06	KIF13B	Kinesin motor domain
M2	7111808	3.703e-06	PTCH1	Sterol-sensing domain of SREBP cleavage-activation
M15	10291455	3.724e-06	DHX34	helicase superfamily c-terminal domain
M16	17374355	3.901e-06	PTPN14	FERM C-terminal PH-like domain
M28	11467629	4.006e-06	NWD2	WD40 repeats
M19	5838160	4.032e-06	-	cellular process regulating host cell cycle in response to virus
M7	16681171	4.21e-06	DESI1	peptidase activity
M14	13928024	4.21e-06	BRAP	BRCA1-associated protein 2
M21	14172695	4.257e-06	EIF5	domain present in translation initiation factor eIF2B and eIF5
M12	2504366	4.751e-06	ARHGEF26	RhoGEF domain
M7	921236	4.952e-06	-	Enoyl-(Acyl carrier protein) reductase
M4	7014146	5.285e-06	METTL9	DREV methyltransferase
M7	6119023	5.323e-06	APEH	Prolyl oligopeptidase family
M22	11597172	5.366e-06	-	Domain of unknown function (DUF4779)
M7	6472839	5.452e-06	cort	WD40 repeats
M5M13	9967609	5.659e-06	-	Chitin binding Peritrophin-A domain
M11	14091245	5.816e-06	SMC2	RecF/RecN/SMC N terminal domain
M27	11005181	6.104e-06	-	Serine carboxypeptidase S28
M14	9556949	6.105e-06	TCHP	negative regulation of cilium assembly
M7	2257211	6.214e-06	-	Coiled-coil domain-containing protein
M15	5672587	6.31e-06	-	PWWP domain
M8	12866595	6.367e-06	btv	ATP-binding dynein motor region D5
M31	8476998	6.711e-06	VPRBP	Lissencephaly type-1-like homology motif
M27	2844302	6.713e-06	ALK	transmembrane receptor protein tyrosine kinase activity. It is involved in the biological process described with protein phosphorylation
M23	13391217	7.469e-06	TDRKH	K homology RNA-binding domain
M6	16454794	7.7e-06	APPBP2	Amyloid protein-binding protein
M12	290829	7.789e-06	-	Rhomboid family
M29	4482190	7.976e-06	WDR62	WD40 repeats
M16	18449248	8.034e-06	SCYL2	Protein tyrosine kinase
M9	17974602	8.263e-06	SRP72	SRP72 RNA-binding domain
M16	7866412	8.29e-06	-	Munc13 (mammalian uncoordinated) homology domain
M28	4738208	8.32e-06	DPYS	Amidohydrolase family
M4	12655661	8.379e-06	CDK14	Protein tyrosine kinase
M8	10873623	8.459e-06	TUBGCP2	Spc97 / Spc98 family
M5M13	3164092	8.835e-06	TFIP11	Tuftelin interacting protein N terminal
M1	10991209	9.214e-06	MEGF8	domain found in Plexins, Semaphorins and Integrins
M7	18151418	9.25e-06	-	L-lysine 6-monooxygenase (NADPH-requiring)
M3	7772245	9.499e-06	MYO6	Myosin VI cargo binding domain
M12	2047114	9.654e-06	dnajc16	DnaJ molecular chaperone homology domain
M11	10479930	1.0443e-05	KIF4A	Kinesin motor, catalytic domain. ATPase.
M1	7750148	1.1062e-05	DPP10	Dipeptidyl peptidase IV (DPP IV) N-terminal region
M15	14177782	1.1295e-05	PRMT5	PRMT5 oligomerisation domain
M4	13096788	1.1311e-05	PRMT7	Arginine methyltransferase that can both catalyze the formation of omega-N monomethylarginine (MMA) and symmetrical dimethylarginine (sDMA)
M31	2440223	1.1416e-05	DNAJB12	Domain of unknown function (DUF1977)
M3	3513994	1.169e-05	drpr	Laminin-type epidermal growth factor-like domai
M27	1504276	1.1853e-05	NPHS1	heterophilic cell-cell adhesion via plasma membrane cell adhesion molecules
M28	10956183	1.2019e-05	GLIS1	Zinc finger, C2H2 type
M6	16133763	1.2937e-05	Cht6	It is involved in the biological process described with carbohydrate metabolic process
M18M26	13934213	1.3027e-05	NOX5	EF-hand domain pair
M6	17514858	1.3861e-05	MIOS	Zinc-ribbon like family
M14	2422860	1.4209e-05	SLC13A5	Citrate transporter
M17	7310339	1.4446e-05	SMARCA4	It is involved in the biological process described with regulation of transcription, DNA-templated
M16	94207	1.4892e-05	EXOC1	Exocyst complex component Sec3
M5M13	28047586	1.4935e-05	SIDT1	dsRNA-gated channel SID-1
M11	960396	1.5295e-05	XRN2	It is involved in the biological process described with nucleobase-containing compound metabolic process
M31	8161472	1.5644e-05	DCTN1	Dynein associated protein
M30	8066068	1.568e-05	CDC25A	Rhodanese Homology Domain
M12	850945	1.5797e-05	L3MBTL3	Present in Drosophila Scm, l(3)mbt, and vertebrate SCML2
M22	15641718	1.5808e-05	UBN1	HPC2 and ubinuclein domain
M27	10070012	1.6194e-05	UVRAG	It is involved in the biological process described with positive regulation of autophagy
M24	6514998	1.6499e-05	SNAPC4	Myb-like DNA-binding domain
M29	6513177	1.6787e-05	-	Zinc finger, C2H2 type
M31	1282354	1.7301e-05	-	-
M1	14043438	1.8137e-05	TOP1	DNA Topoisomerase I (eukaryota)
M25	2827989	1.8489e-05	PSIP1	Lens epithelium-derived growth factor (LEDGF)
M18M26	23776166	1.8571e-05	RPS6KC1	Protein kinase domain
M31	6816134	1.8903e-05	-	Lipid transporter activity. It is involved in the biological process described with lipid transport
M24	5370239	1.9026e-05	DHX9	ATP-dependent helicase activity
M3	12397102	1.9579e-05	PHF14	Zinc ion binding
M4	7587220	2.0054e-05	-	Belongs to the sodium solute symporter (SSF) (TC 2.A.21) family
M27	574872	2.0988e-05	nrm	Immunoglobulin
M12	15700854	2.1068e-05	-	Domain with 2 conserved Trp (W) residues
M5M13	22061879	2.1327e-05	EFCAB8	Nucleoporin Nup120/160
M19	4253417	2.1362e-05	Cas	Cse1
M7	16746830	2.1878e-05	-	STAS domain
M22	4790575	2.2832e-05	TCP11	T-complex protein 11
M24	12771723	2.3003e-05
M24	13605302	2.3047e-05	C12orf4	Uncharacterized conserved protein (DUF2362)
M4	8181938	2.3079e-05	-	Ring finger
M11	7847865	2.3423e-05
M8	4018087	2.3733e-05	-	Ankyrin repeats (many copies)
M24	10547687	2.3836e-05	-	Protein of unknown function (DUF1676)
M12	12697762	2.4579e-05	RIF1	Replication timing regulatory factor 1
M19	6038623	2.5614e-05	DEK	DNA binding
M7	12402016	2.6868e-05	SHMT1	Serine hydroxymethyltransferase
M1	3667369	2.705e-05	MROH1	maestro heat-like repeat-containing protein family member
M23	12283232	2.8553e-05	PLCXD2	phosphoric diester hydrolase activity. It is involved in the biological process described with
M15	9524277	2.8919e-05	ALDH2	Aldehyde dehydrogenase family
M3	14187443	2.9032e-05	KMT2D	PHD-like zinc-binding domain
M7	15603432	3.1506e-05	ACADS	Acyl-CoA dehydrogenase, C-terminal domain
M18M26	253059	3.1655e-05	MYO1A	Unconventional myosin tail, actin- and lipid-binding
M18M26	2442721	3.178e-05	-	Lipid storage droplets
M4	494922	3.2734e-05	-	cellular response to estrogen stimulus
M10	10564155	3.2872e-05	-	-
M6	17033150	3.2984e-05	-	pupariation
M15	8822794	3.3553e-05	-	protein tyrosine phosphatase activity
M17	12862341	3.4108e-05	CCDC39	Coiled-coil domain-containing protein 39
MZ	30749371	3.415e-05	JADE2	Zinc ion binding
M28	950642	3.5768e-05	WNK2	It is involved in the biological process described with protein phosphorylation
M2	9668466	3.6117e-05	CHD1	DUF4208
M5M13	13232462	3.6393e-05	-	Insect cuticle protein
M15	10975517	3.9018e-05	DMXL1	WD40 repeats
M14	4549423	3.9318e-05	-	twin BRCT domain
M21	4681978	4.016e-05	NCAM2	Fibronectin type 3 domain
M11	8692380	4.0566e-05	POLE	It is involved in the biological process described with DNA replication
M6	10354309	4.3269e-05	-	-
M4	4583772	4.3796e-05	EZH1	Tesmin/TSO1-like CXC domain
M2	14603653	4.4033e-05	-	Domain of unknown function (DUF4773)
M18M26	20203987	4.4061e-05	ANO8	Calcium-activated chloride channel
M29	5203371	4.4536e-05	GMFG	Cofilin/tropomyosin-type actin-binding protein
M16	7326019	4.4656e-05
M23	9850226	4.552e-05	PRKG1	Cyclic nucleotide-monophosphate binding domain
M5M13	18406635	4.7024e-05	kinesin-B	Kinesin motor, catalytic domain. ATPase.
M25	3523139	4.8259e-05	-	Ubiquitin-2 like Rad60 SUMO-like
M19	588106	5.0377e-05	-	5'-nucleotidase, C-terminal domain
M10	3867372	5.0423e-05	TMEM214	TMEM214, C-terminal, caspase 4 activator
M25	2192057	5.167e-05	PRSS41	Belongs to the peptidase S1 family
M1	13134138	5.2007e-05	OTUD6B	OTU-like cysteine protease
M12	14725167	5.2053e-05	UBE3B	ubiquitin-protein
M21	9576558	5.4452e-05	PPP1R13B	Src homology 3 domains
M8	298292	5.5251e-05	HELQ	helicase superfamily c-terminal domain
M18M26	7838695	5.5487e-05	UNC80	Cation channel complex component UNC80
M16	11555017	5.6377e-05	-	Structural constituent of cuticle
M17	12949003	5.6853e-05	ITIH5	Vault protein inter-alpha-trypsin domain
M4	11569378	5.7292e-05	SUZ12	VEFS-Box of polycomb protein
M12	1148468	5.8048e-05	CASPL2	Caspase recruitment domain
M15	2141341	5.8695e-05	FK506-bp1	Peptidyl-prolyl cis-trans isomerase
M19	4415038	5.895e-05	-	It is involved in the biological process described with intein-mediated protein splicing
M5M13	14525507	5.9412e-05	fusl	Fuseless
M2	8957523	5.9843e-05	-	activity. It is involved in the biological process described with microtubule-based movement
M1	7410597	6.1682e-05	EYS	Laminin G domain
M12	13104848	6.1932e-05	PTPRN	Protein-tyrosine phosphatase receptor IA-2
M9	9225024	6.2378e-05	ABCG5	ATP binding
M8	18084620	6.2666e-05	NELL2	Thrombospondin N-terminal -like domains.
M31	447132	6.3005e-05	-	-
M10	13171892	6.3058e-05	SEPHS1	AIR synthase related protein, N-terminal domain
M15	16765670	6.5806e-05	-	Immunoglobulin V-set domain
M19	6497817	6.6373e-05	PDS5A	Sister chromatid cohesion protein PDS5 homolog
M20	1199778	6.8216e-05	-	-
M19	6986452	6.84e-05	-	-
M8	15591066	6.8952e-05	MAK16	Mak16 protein C-terminal region
M29	79872	7.1416e-05	NDUFS2	Respiratory-chain NADH dehydrogenase, 49 Kd subunit
M24	3594021	7.1848e-05	ATRN	domain found in Plexins, Semaphorins and Integrins
M31	6513114	7.7572e-05	PLCE1	calcium-dependent phospholipase C activity
M31	7168617	7.7689e-05	WDR60	WD40 repeats
M14	2904352	7.7722e-05	CERS5	DNA binding
M11	3766668	7.7747e-05	RALGAPA2	GTPase activator activity. It is involved in the biological process described with regulation of small GTPase mediated signal transduction
M10	9582605	7.9291e-05	DAG1	Dystroglycan (Dystrophin-associated glycoprotein 1)
M24	13619639	8.0943e-05	Mlc2	EF-hand domain
M24	1656884	8.2668e-05	RBM34	nucleic acid binding
M3	8935442	8.8958e-05	-	Cytochrome P450
M17	10664555	8.9534e-05	AP3D1	Belongs to the adaptor complexes large subunit family
M9	5601778	9.2245e-05
M10	1832874	9.4188e-05	FOCAD	Protein of unknown function (DUF3730)
M11	7172908	9.5516e-05	-	-
M6	17869937	9.8849e-05	MRAS	Ras subfamily of RAS small GTPases
M1	20205269	9.8913e-05	ACSL4	AMP-binding enzyme C-terminal domain
M22	16712119	9.9888e-05	CORO7	DUF1900
M29	7394896	0.000101334	-	Leucine rich repeat
M3	2110825	0.000101654	-	ERAP1-like C-terminal domain
M27	2371663	0.000102656	TBCE	CAP_GLY
M4	6956888	0.000106949	PPP1R9A	protein phosphatase 1 regulatory
M21	13814266	0.000108276	-	AMP-binding enzyme C-terminal domain
M21	9092890	0.000108603	NPC1	Niemann-Pick C1 N terminus
M29	2612422	0.000111367	ANKRD50	Ankyrin repeats (many copies)
M20	989942	0.000114065	-	Structural component of the gap junctions
M24	298680	0.000114139	B4GALT7	N-terminal region of glycosyl transferase group 7
M14	2475218	0.000115609	-	CRAL/TRIO domain
M10	901544	0.000118078	TAZ	Acyltransferase
M11	7377308	0.000119732	BPNT1	Inositol monophosphatase family
M10	16182993	0.000120561	CES2	alpha/beta hydrolase fold
M11	9186226	0.000122262	-	Protein of unknown function (DUF4497)
M29	7698341	0.000125793	OCA2	Citrate transporter
M29	5270278	0.000126543	TTBK2	ATP binding. It is involved in the biological process described with protein phosphorylation
M18M26	23169257	0.000130254	Incenp	chromosome segregation
M6	17324939	0.000130621	SMC1B	P-loop containing region of AAA domain
M10	16285840	0.000133568	WDR89	WD40 repeats
M1	6140866	0.000135135	-	Gag P30 core shell protein
M5M13	22118616	0.000136907	SPTLC2	Aminotransferase class I and II
M18M26	2565672	0.000138013	XYLB	FGGY family of carbohydrate kinases, N-terminal domain
M8	8224373	0.000141341	TRPC1	Transient receptor ion channel II
M14	9359697	0.000142191	SETD8	SET (Su(var)3-9, Enhancer-of-zeste, Trithorax) domain
M5M13	13736662	0.000142923	ASAH2	Neutral/alkaline non-lysosomal ceramidase, C-terminal
M2	829232	0.000143424	FSIP2	fibrous sheath-interacting protein
M12	17073337	0.000144021	KIAA0100	RNA pol II promoter Fmp27 protein domain
M30	5214952	0.000145606	LARP1B	Domain in the RNA-binding Lupus La protein; unknown function
M17	9854006	0.000149437	INTS8	Integrator complex subunit
M31	6177985	0.000157751	-	Transferrin
M8	10885893	0.000157982	pain	Ion transport protein
M8	15638530	0.000161159	GEMIN5	WD40 repeats
M18M26	13842973	0.000163331	-	MYND finger
M6	17097837	0.000164656	SEC14L1	It is involved in the biological process described with transport
M11	9062241	0.000164906	CCDC135	Coiled-coil domain-containing protein
M6	8364693	0.000166357	RAD50	AAA domain
MZ	24587075	0.000166994	KIAA1107	Broad-Complex, Tramtrack and Bric a brac
M31	7225191	0.000167042	-	Transferrin
M24	11203924	0.000168941	-	Fumarylacetoacetate (FAA) hydrolase family
M5M13	13481380	0.000169366	DNAH2	ATP-binding dynein motor region D5
M25	8495973	0.000170495	YEATS2	YEATS family
M10	4756731	0.000172468	BBS2	Ciliary BBSome complex subunit 2, middle region
M25	4718745	0.000174917	SLC28A3	Nucleoside sodium symporter activity. It is involved in the biological process described with transport
MZ	26009207	0.000179919	-	-
M28	5771384	0.000180272	lgs	B-cell lymphoma 9 protein
M6	17541158	0.000183391	WDR24	WD repeat-containing protein
M3	16854616	0.000185744	AGAP3	GTP binding. It is involved in the biological process described with regulation of ARF GTPase activity
M5M13	12353545	0.000186862	-	-
M30	2703092	0.000187348	-	-
M18M26	16211106	0.000188196	-	sodium channel activity
M31	6976641	0.000189621	ACAD9	flavin adenine dinucleotide binding. It is involved in the biological process described with oxidation-reduction process
M18M26	20051136	0.0001937	-	Rho guanyl-nucleotide exchange factor activity. It is involved in the biological process described with regulation of Rho protein signal transduction
M28	10198369	0.000195301	-	Zinc-finger associated domain (zf-AD)
MZ	22432237	0.000196282	SCAP	Sterol-sensing domain of SREBP cleavage-activation
M6	16298789	0.000198359	PFKFB2	6-phosphofructo-2-kinase
M17	10995719	0.000198628	EXTL3	Glycosyl transferase family 64 domain
M18M26	12126523	0.000200996	DHX30	Helicase associated domain (HA2)
M4	9267481	0.000202583	TPR	TPR/MLP1/MLP2-like protein
M16	15319944	0.000208624	-	Haloacid dehalogenase-like hydrolase
M7	6914939	0.00021054	WDR13	WD domain, G-beta repeat
M12	1996806	0.000217104	RABGEF1	Zinc ion binding
M5M13	13811070	0.000219802	SWT1	PIN domain
M2	20170417	0.000220099	PRCP	Serine carboxypeptidase S28
M5M13	2881616	0.00022253	MICU3	EF-hand domain
M5M13	9959974	0.000232565	GLTSCR2	Nop53 (60S ribosomal biogenesis)
M16	11459710	0.000233921	SON	glycine rich nucleic binding domain
M5M13	22860133	0.000235625
M25	3881695	0.000236752	-	Aldo/keto reductase family
M23	15723473	0.000240145
M28	2360701	0.000242021	GABBR2	Receptor family ligand binding region
M9	520124	0.000243162	OGDHL	Dehydrogenase E1 component
M12	10244330	0.000245007	SMG6	Telomerase activating protein Est1
M16	475294	0.000245898	FNBP4	Domain with 2 conserved Trp (W) residues
M11	6151781	0.000246115	MTHFD1L	Formate--tetrahydrofolate ligase
M29	6474146	0.00024931	BRCA2	BRCA2, helical
M14	13830369	0.000251411	USP32	Belongs to the peptidase C19 family
M21	12646702	0.000253962	eef1g	Elongation factor 1 gamma, conserved domain
M16	105401	0.000255455	MFSD8	Major Facilitator Superfamily
M3	2506371	0.000258879	-	Peptidase family M1 domain
MZ	35235701	0.00026112	ARFGAP1	ARF GTPase activator activity. It is involved in the biological process described with regulation of ARF GTPase activity
M23	13093047	0.000265734	CCDC47	Protein of unknown function (DUF1682)
M12	4930896	0.000277519	-	Domain first found in C1r, C1s, uEGF, and bone morphogenetic protein.
M5M13	9876084	0.000279086	-	Catalyzes the cleavage of glutathione into 5-oxo-L- proline and a Cys-Gly dipeptide. Acts specifically on glutathione, but not on other gamma-glutamyl peptides
M19	4088348	0.000279999	-	Zinc ion binding
M23	14330518	0.000280072	AAAS	WD domain, G-beta repeat
M18M26	14098554	0.000289887	RBM5	G-patch domain
M3	8762645	0.000291219	-	-
M21	7955731	0.00029226	NXF1	C-terminal domain of vertebrate Tap protein
M31	4317916	0.000292295	TNKS2	Ankyrin repeat
M6	13424757	0.000296048	SUPT6H	Transcription elongation factor that enhances transcription elongation by RNA polymerase II (RNAPII)
M10	16297508	0.00029613	CYHR1	Ring finger
M21	3386877	0.000296303	MAEL	piRNA pathway germ-plasm component
M16	13557892	0.000297454	-	ionotropic glutamate receptor activity
M12	4448320	0.000298379	CHD5	CHDCT2 (NUC038) domain
M12	9231075	0.000300354	-	cell differentiation
M10	7715957	0.000303211	TRIP13	ATPase family associated with various cellular activities (AAA)
M5M13	7179315	0.000306008	CEP152	Centrosomal protein
M25	4803389	0.000319629	CCDC13	non-motile cilium assembly
M19	12504907	0.000321645	-	scavenger receptor activity
M27	3676604	0.000321665	GANC	Galactose mutarotase-like
M30	5330116	0.000328343	RPL4	60S ribosomal protein L4 C-terminal domain
M14	3989773	0.000329237	PI4KA	Belongs to the PI3 PI4-kinase family
M29	7518406	0.000334782	-	-
M4	2096296	0.000339055	ICK	Serine/Threonine protein kinases, catalytic domain
M22	3469601	0.000348613	ANKS1A	Ankyrin repeat
M12	3661020	0.000358075	PPIL2	Cyclophilin type peptidyl-prolyl cis-trans isomerase/CLD
M6	15892053	0.000360741	DDX47	helicase superfamily c-terminal domain
M19	1338511	0.000362741	-	Oxysterol-binding protein
M27	5737728	0.000363186	SNW1	SKIP/SNW domain
M27	5773682	0.000363524	gek	KELK-motif containing domain of MRCK Ser/Thr protein kinase
M14	1686410	0.000364096	TPCN1	Ion transport protein
M22	1579375	0.000368883	TRMT13	Methyltransferase TRM13
M22	16761328	0.000372532	POLG	DNA-directed DNA polymerase activity. It is involved in the biological process described with DNA replication
M16	16611483	0.00038063	-	Domain present in phytochromes and cGMP-specific phosphodiesterases.
M15	15732739	0.000383768	-	AAA domain (Cdc48 subfamily)
M1	6384460	0.00038463	TTC14	TPR repeat
M25	4320636	0.000392139	STARD3	in StAR and phosphatidylcholine transfer protein
MZ	33058907	0.000395227	NAPG	Soluble NSF attachment protein, SNAP
M16	17627778	0.000400871	syd-2	It is involved in the biological process described with cell-matrix adhesion
M12	12730674	0.000402047	-	-
M5M13	28010026	0.000404606	GCC1	It is involved in the biological process described with protein targeting to Golgi
M25	3714686	0.000406606	ACTL6A	Actin
M5M13	21099561	0.000406761	-	Oxidoreductase activity, acting on paired donors, with oxidation of a pair of donors resulting in the reduction of molecular oxygen to two molecules of water. It is involved in the biological process described with oxidation-reduction process
M12	15671737	0.000408173	TTC27	Tetratricopeptide repeat
M11	10783786	0.000416418	DDB1	CPSF A subunit region
M28	6550897	0.000418826	PLS3	Calponin homology domain
M31	4819867	0.000425523	KIN	Domain of Kin17 curved DNA-binding protein
M28	9359445	0.000431178	-	-
M27	2965546	0.000432376	WDR43	Dip2/Utp12 Family
M5M13	4674360	0.000438275	TJP2	Belongs to the MAGUK family
M19	4873825	0.000443513	DPF3	zinc ion binding
M30	6388964	0.00044373	-	Transmembrane protein 26
M10	1029388	0.000449846	GNB5	WD domain, G-beta repeat
M7	14996674	0.000453117	ACO2	Aconitase family (aconitate hydratase)
M6	11511069	0.000455767	HEATR6	Domain of unknown function (DUF4042)
M8	13245621	0.000456531	NDUFA9	NAD dependent epimerase/dehydratase family
M18M26	16721516	0.000457956	-	-
M7	15387123	0.00046095	-	Domain of unknown function (DUF3535)
M5M13	2464757	0.000466179	-	Chitinase A, N-terminal domain
M17	8171336	0.000468004	Cpap3-e	Chitin-binding domain type 2
M18M26	21351735	0.00047989
M8	11601444	0.000480101	NUP50	NUP50 (Nucleoporin 50 kDa)
M8	1972466	0.000481598	GNMT	ubiE/COQ5 methyltransferase family
M14	5334225	0.000484362	-	ALMS motif
MZ	25128215	0.000485621	NEURL4	NEUZ
M25	2486105	0.000487418	TDRD12	Tudor domain
M17	13046223	0.000490548	MED12	RNA polymerase II transcription cofactor activity. It is involved in the biological process described with regulation of transcription from RNA polymerase II promoter
M14	4839172	0.000499279	-	zinc finger
M1	9290496	0.000504508	-	G-protein coupled receptor activity. It is involved in the biological process described with G-protein coupled receptor signaling pathway
MZ	32289689	0.000528564	SLC35D2	Triose-phosphate Transporter family
M24	8760157	0.000541721	CTBP1	D-isomer specific 2-hydroxyacid dehydrogenase, catalytic domain
M5M13	26009553	0.000544252	IGSF9B	Immunoglobulin V-set domain
M1	2774547	0.000545975	METTL13	Methyltransferase domain
M23	5202259	0.000549606	-	zinc finger
M9	14980869	0.000551565	Arr2	Arrestin (or S-antigen), C-terminal domain
M24	3121734	0.000552626	LCT	Glycosyl hydrolase family 1
M22	8439584	0.000553004	-	It is involved in the biological process described with cell-matrix adhesion
M12	8608943	0.000562503	-	WD40 repeats
M17	11259272	0.00056389	B3GALT6	Galactosyltransferase
M16	1167189	0.000568797	TTC7B	Tetratricopeptide repeat protein
M4	5458195	0.000569023	UTP6	U3 small nucleolar RNA-associated protein 6
M9	7417256	0.000569171	ELOVL7	GNS1/SUR4 family
M14	8989633	0.00056928	-	Wiskott Aldrich syndrome homology region 2
M19	8680534	0.000569291	EFR3A	Protein EFR3 homolog
M10	1056350	0.000575489	-	Immunoglobulin
M19	2072007	0.000579679	KXD1	Uncharacterized conserved protein
M6	11862466	0.000590873	NCAPD2	Regulatory subunit of the condensin complex, a complex required for conversion of interphase chromatin into mitotic-like condense chromosomes. The condensin complex probably introduces positive supercoils into relaxed DNA in the presence of type I topoisomerases and converts nicked DNA into positive knotted forms in the presence of type II topoisomerases
M10	7172866	0.00059844	PDE8B	3'5'-cyclic nucleotide phosphodiesterase
M24	6495460	0.000607884	-	Zinc finger, C2H2 type
M9	16712218	0.00062447	KMT2E	Zinc ion binding
M14	12113484	0.000627097	PRODH	Proline dehydrogenase
M31	5876858	0.000628691	PANK1	Fumble
M23	12613892	0.00063193	VPS11	Zinc ion binding
M18M26	7041856	0.000637873	LIMS2	Zinc-binding domain present in Lin-11, Isl-1, Mec-3.
M5M13	21383413	0.000641532	SGPP1	PAP2 superfamily
M10	793758	0.000644823	-	Transmembrane transporter activity. It is involved in the biological process described with transmembrane transport
M5M13	6141986	0.000644867	-	Pyridoxal-dependent decarboxylase conserved domain
M28	1981986	0.000653103	MPHOSPH10	Involved in nucleolar processing of pre-18S ribosomal RNA
M8	2462376	0.000654314	-	Sprouty protein (Spry)
M14	12316595	0.000662058	CCDC42	Domain of unknown function (DUF4200)
M2	18227162	0.000663471	-	Organic Anion Transporter Polypeptide (OATP) family
M31	306314	0.000666939	STARD7	Lipid binding
M19	11552373	0.000687406	CHPF	Acetylgalactosaminyltransferase activity
M19	6592480	0.000694277	PSMB5	Proteasome subunit
M20	1071444	0.000701865	DUSP12	Dual specificity phosphatase, catalytic domain
M1	10762057	0.00070629	NCOA2	activity. It is involved in the biological process described with signal transduction
M21	9286168	0.000715801	CLASRP	Alternative splicing regulator
M12	9379456	0.000720636	SDK2	Immunoglobulin like
M23	15208138	0.000732081	TMEM57	Macoilin family
M7	1790799	0.000736944	NFX1	R3H domain
M17	11763626	0.000769987	IDH2	Isocitrate/isopropylmalate dehydrogenase
M5M13	4896356	0.000773964	EIF2AK3	Protein tyrosine kinase
M19	5478263	0.000780388	SMAP1	Putative GTP-ase activating proteins for the small GTPase, ARF
M2	11650342	0.000785951	-	vesicle docking involved in exocytosis
M1	15580000	0.00080413	TM9SF2	Endomembrane protein 70
M17	10527235	0.000807297	GOLGA4	GRIP domain
M1	8815014	0.000807991	DNAJA2	DnaJ central domain
M3	11054368	0.000813626	-	-
M16	4837222	0.000819064	PLD4	PLD-like domain
M1	2216582	0.000821066	CACFD1	Uncharacterized conserved protein CG6151-P
M15	9361177	0.000826906	-	Protein tyrosine phosphatase, catalytic domain
M9	10945238	0.000832502	CTL6	carbohydrate binding
M7	4415520	0.000833972	HGS	Hepatocyte growth factor-regulated tyrosine kinase substrate
M11	5448941	0.000837654	-	L-lysine 6-monooxygenase (NADPH-requiring)
M18M26	17605545	0.000842652	MYBL1	DNA- binding
M8	9422937	0.000845441	-	MFS_1 like family
M8	13710325	0.000852837	-	Otopetrin
M9	16111821	0.000865866	-	Elongation of very long chain fatty acids protein
M18M26	14679640	0.000866745	-	extracellular matrix
M4	16939041	0.000867784	SPTLC1	Aminotransferase class I and II
M22	9393591	0.000867844	GUCY1A2	Heme NO binding associated
M21	4881790	0.000877506	SORL1	VPS10
M8	7611911	0.000879299	-	Zinc finger, C2H2 type
M9	16262237	0.000886941	-	-
M14	2556608	0.00089117	ARHGAP9	GTPase activator activity
M7	8651385	0.000896741	PSMD12	motif in proteasome subunits, Int-6, Nip-1 and TRIP-15
M12	7669552	0.000903709	tnc-2	EF hand
M24	567225	0.000904733	TAB1	Serine/threonine phosphatases, family 2C, catalytic domain
M25	4238725	0.00090763	SLC39A6	Metal ion transmembrane transporter activity. It is involved in the biological process described with metal ion transport
MZ	34980746	0.000914421	-	SET and MYND
M1	3731514	0.000920281	ASTE1	XPG domain containing
M31	5225839	0.000940818	CDK9	Haspin like kinase domain
M31	2869466	0.000940881	TMX2	Thioredoxin
M3	2642618	0.000949911	CDC40	WD domain, G-beta repeat
M9	3449981	0.000958041	IPO13	Ran GTPase binding. It is involved in the biological process described with intracellular protein transport
M4	4581129	0.000959689	C19orf43	5'-3' exonuclease activity
M12	8478053	0.000964654	-	It is involved in the biological process described with
M17	6879776	0.000965587	HENMT1	O-methyltransferase activity. It is involved in the biological process described with RNA methylation
M16	12764212	0.000980402	-	-
M18M26	9490190	0.000987174	-	Collagen triple helix repeat (20 copies)
M11	1091419	0.00100151	RDH13	KR domain
M24	12072593	0.00100377	Htr4	Serpentine type 7TM GPCR chemoreceptor Srx
M16	1235690	0.00100896	-	Sugar (and other) transporter
M19	4845021	0.00100969	UGCG	Glycosyl transferase family 21
M5M13	5348131	0.00101049	NPR2	Adenylyl- / guanylyl cyclase, catalytic domain
M4	10678291	0.00102075	-	Tumour suppressing sub-chromosomal transferable candidate 4
MZ	22140532	0.00103288	PHGDH	D-isomer specific 2-hydroxyacid dehydrogenase, catalytic domain
M5M13	6087643	0.00105001	-	GTPase-activator protein for Rho-like GTPases
M9	7293415	0.00105384	Y-f	Major royal jelly protein
M6	17814938	0.00106476	-	Kelch motif
M27	10562909	0.00107509	-	Ectodermal ciliogenesis protein
M31	8582745	0.00108087	KIF3A	Microtubule binding
M25	6315262	0.00109522
M16	17864062	0.00110161	TMEM183A	-
M2	18712388	0.00110843	MCAT	Transferase activity. It is involved in the biological process described with metabolic process
M29	6834744	0.00113073	RBM26	binding. It is involved in the biological process described with mRNA processing
M15	14545587	0.00115183	TRMT1	N2,N2-dimethylguanosine tRNA methyltransferase
M5M13	4189239	0.00115475	-	MAP-kinase scaffold activity
M16	12610317	0.00115694	TBCB	CAP_GLY
M14	11562101	0.00116609	-	Astacin (Peptidase family M12A)
M10	10885133	0.00117168	PSMA4	The proteasome is a multicatalytic proteinase complex which is characterized by its ability to cleave peptides with Arg, Phe, Tyr, Leu, and Glu adjacent to the leaving group at neutral or slightly basic pH
M23	1494163	0.00117202	SMARCAL1	HepA-related protein (HARP)
M7	2328565	0.00117285	WDR81	Beige/BEACH domain
M30	6078965	0.00117805
M29	7433747	0.00118486	PATL1	deadenylation-dependent decapping of nuclear-transcribed mRNA
M15	5560833	0.00118697	ASH1L	Histone-lysine N-methyltransferase
M1	2422887	0.00119083
M18M26	14310837	0.00121815	MLH3	MutL C terminal dimerisation domain
M5M13	906793	0.0012248	FHDC1	Diaphanous FH3 Domain
M4	2034152	0.00123101	GAA	Glycosyl hydrolases family 31
M14	1907438	0.00126929	ABCA5	ABC transporter
M5M13	24011297	0.00127705	aub	Piwi
M19	7737630	0.00128222	RREB1	Zinc finger, C2H2 type
M10	11740844	0.00130415	-	beta-acetyl hexosaminidase like
M15	12582824	0.00131071	RALGAPB	GTPase activator activity. It is involved in the biological process described with regulation of small GTPase mediated signal transduction
M3	2446167	0.00131681	-	Peptidase family M1 domain
M3	7886399	0.0013242	UTP18	WD40 repeats
M12	16138860	0.0013353	-	Sugar (and other) transporter
M6	17561787	0.00133549	-	Ras of Complex, Roc, domain of DAPkinase
M2	15404562	0.00133836	-	Pyruvate phosphate dikinase, PEP/pyruvate binding domain
M1	2118870	0.00134332	NME9	Domain of unknown function (DUF4746)
M12	9914250	0.00135909	NIPBL	Sister chromatid cohesion C-terminus
M4	16583346	0.00136155	TOP2B	Control of topological states of DNA by transient breakage and subsequent rejoining of DNA strands. Topoisomerase II makes double-strand breaks
M29	6744943	0.00137042	MAN2B1	Glycosyl hydrolases family 38 C-terminal domain
M4	10441896	0.00137408	-	Starch/carbohydrate-binding module (family 53)
M19	9154570	0.00137805	-	Prolyl oligopeptidase family
M4	16376111	0.00138123	ATF7IP	Fibronectin-III type domain
M10	13178955	0.00138301	-	-
M21	13900017	0.00138943	-	Iron/zinc purple acid phosphatase-like protein C
M7	15020484	0.0013916	EXOC6	Component of the exocyst complex involved in the docking of exocytic vesicles with fusion sites on the plasma membrane
M6	16030538	0.00141295	TRA2B	RNA recognition motif
M6	5874469	0.00142371	RACGAP1	GTPase-activator protein for Rho-like GTPases
M6	11947200	0.00143234	CMTR1	G-patch domain
MZ	23964837	0.0014392	SURF1	Probably involved in the biogenesis of the COX complex
M8	18163757	0.00145391	EPHX4	alpha/beta hydrolase fold
M2	11138230	0.00146567	-	Carboxylesterase family
M10	13240109	0.00146696	TRIP4	Putative zinc finger motif, C2HC5-type
M6	1196574	0.0014751
M9	12709558	0.00148469	MLLT4	DIL
M4	8522571	0.00148704	MRPS34	Mitochondrial 28S ribosomal protein S34
M9	10681566	0.00148785	-	GNS1/SUR4 family
M22	13111572	0.00149394
M4	13088248	0.00150136	CYC1	Cytochrome C1 family
M5M13	17754966	0.00150395	Tango1	-
M24	5033549	0.00151446	ent-3	Nucleoside transporter
M6	4486925	0.00151665	PTPN3	FERM C-terminal PH-like domain
M28	826873	0.00152269	ITPR1	Inositol 1,4,5-trisphosphate/ryanodine receptor
M1	4792612	0.00152378	PPT2	Palmitoyl protein thioesterase
M23	13186086	0.00152556	WASF1	Wiskott Aldrich syndrome homology region 2
M27	2456801	0.00152864	ENAH	WH1 domain
M5M13	13021670	0.00152887	dl	Rel homology DNA-binding domain
M18M26	2474065	0.00152947	FBXO9	F-box only protein
M5M13	13346054	0.00153181	STIP1	Heat shock chaperonin-binding motif.
M4	11590816	0.00154096	Pdi	Thioredoxin-like domain
M1	7157867	0.00154338	-	Sodium:solute symporter family
M5M13	3031432	0.0015481	R3HCC1L	nucleotide binding
M3	7607648	0.00156066	DDX54	helicase superfamily c-terminal domain
M6	12019186	0.00156566	ULK2	Domain of unknown function (DUF3543)
M8	12760362	0.00159698	-	Otopetrin
M11	2254443	0.00159823	SLC8A3	Belongs to the Ca(2 ) cation antiporter (CaCA) (TC 2.A.19) family
MZ	21165458	0.00161804	LDHB	lactate/malate dehydrogenase, NAD binding domain
M7	2748207	0.00162456	-	-
M4	1302449	0.00164435	-	-
M14	10258794	0.00164758	-	-
M31	4540058	0.00166576	ILF2	DZF domain
M10	8835463	0.00167227	morgue	A Receptor for Ubiquitination Targets
M4	6600553	0.00168788	WBP11	WW domain binding protein 11
M11	11999657	0.0016921	EPRS	ligase activity. It is involved in the biological process described with glutamyl-tRNA aminoacylation
M20	2324939	0.00169796	FPGS	Mur ligase middle domain
M1	5326185	0.00170807	RNGTT	Bifunctional mRNA-capping enzyme exhibiting RNA 5'- triphosphatase activity in the N-terminal part and mRNA guanylyltransferase activity in the C-terminal part. Catalyzes the first two steps of cap formation by removing the gamma-phosphate from the 5'-triphosphate end of nascent mRNA to yield a diphosphate end, and by transferring the gmp moiety of GTP to the 5'-diphosphate terminus
M20	2554915	0.00172025	GAPVD1	It is involved in the biological process described with regulation of Ras GTPase activity
M1	2154786	0.00172049	RAB5A	Ras family
M31	7000077	0.00180457	-	Bacterial extracellular solute-binding proteins, family 3
M17	9239358	0.00181492	RAPGEF1	Guanine nucleotide exchange factor for Ras-like small GTPases
MZ	24031385	0.00182466	SPAG17	axonemal central apparatus assembly
M17	11934218	0.00183241	CTNNBL1	Eukaryotic domain of unknown function (DUF1716)
M14	3843857	0.00184067	NAA25	Non-catalytic subunit of the NatB complex which catalyzes acetylation of the N-terminal methionine residues of proteins beginning with Met-Asp or Met-Glu (By similarity). Has 2 roles in the larval immune response required both for the phagocytic degradation of internalized bacteria and for the induction of Defensin in the fat body. Within the phagocytic blood cells, has a role in detection of inf…
M27	7717031	0.0018611	PLEKHG1	RhoGEF domain
M14	2353898	0.00186473	PIGS	Phosphatidylinositol-glycan biosynthesis class S protein
MZ	31570671	0.00186677	PPP1R12C	Ankyrin repeat
M1	14437625	0.00187029	uzip	-
M9	12678531	0.0018869	DUSP6	Dual specificity phosphatase, catalytic domain
M30	7974873	0.0018886	-	-
M10	233642	0.00189637	GTF2H4	Component of the core-TFIIH basal transcription factor involved in nucleotide excision repair (NER) of DNA
M19	8437624	0.00190018	-	Sugar (and other) transporter
M3	7105843	0.00190926	KIAA0825	Domain of unknown function (DUF4495)
M1	17014251	0.00190965	SPIRE2	actin binding
M19	1554701	0.00191525	-	Domain abundant in complement control proteins; SUSHI repeat; short complement-like repeat (SCR)
M1	7195804	0.00195556	-	Sodium:neurotransmitter symporter family
M24	13358336	0.0019556	SLC25A37	Mitochondrial carrier protein
M2	21095222	0.00197746	DPH2	Required for the first step in the synthesis of diphthamide, a post-translational modification of histidine which occurs in translation elongation factor 2
M21	9168737	0.00200572	TUBGCP6	Spc97 / Spc98 family
M6	13317540	0.0020172	HIP1	I/LWEQ domain
M7	8631578	0.00202155	KIAA0430	nucleic acid binding. It is involved in the biological process described with regulation of gene expression
M18M26	13534120	0.00203681	-	transferase activity, transferring acyl groups other than amino-acyl groups
M16	18734569	0.00205244	-	Alpha/beta hydrolase family
M21	10445375	0.00205807	DROSHA	Double-stranded RNA binding motif
M15	9153178	0.00206338	CHSY1	Chondroitin N-acetylgalactosaminyltransferase
M19	481594	0.00206625	DDX24	helicase superfamily c-terminal domain
M21	4237730	0.00208351	-	phosphatase activity. It is involved in the biological process described with metabolic process
M8	8797807	0.00208533	Vamp2	Synaptobrevin
M6	14228244	0.00208565	-	CD80-like C2-set immunoglobulin domain
M7	13841482	0.00210497	TSEN54	tRNA-splicing endonuclease subunit sen54 N-term
M23	16170823	0.00210574	ZFAND4	Ubiquitin homologues
M14	5754098	0.00213175	Orco	7tm Odorant receptor
M18M26	1591345	0.00214657	FKBP5	FKBP-type peptidyl-prolyl cis-trans isomerase
M3	3905491	0.00218113	SHH	Hint (Hedgehog/Intein) domain N-terminal region
M23	13306351	0.00218952	NSUN4	Belongs to the class I-like SAM-binding methyltransferase superfamily. RsmB NOP family
M19	10352742	0.00220071	CEP104	Centrosomal protein
M12	13028333	0.00220672	XRCC6BP1	Peptidase M76 family
M1	17302427	0.00220913	-	Microtubule binding
M31	6902452	0.00221432	GRIK1	Ligand-gated ion channel
M28	5834609	0.00222731	DHCR24	FAD binding domain
M18M26	4459293	0.00223678	EIF4B	translation Initiation Factor
M18M26	1605701	0.00223844	Tango10	BTB POZ domain-containing protein
M28	4418854	0.00224343	-	involucrin
M24	5420174	0.00224495	-	Sulfotransferase domain
M2	1964860	0.00225881	PDIA3	Thioredoxin-like domain
M18M26	734494	0.00226244	MAP3K4	Protein tyrosine kinase
M10	3718306	0.00226798	SLC24A2	Sodium/calcium exchanger protein
M29	5097662	0.00226829	ATP7B	Heavy-metal-associated domain
M14	349020	0.00228538	-	DNA binding
M7	4717665	0.0022883	FOXK2	Forkhead associated domain
M9	12641016	0.00230581	RANBP3	Ran-binding domain
M10	6678674	0.00233727	-	Alpha galactosidase A
M11	3641095	0.00234318	-	Ubiquitin carboxyl-terminal hydrolase
M24	1724228	0.00234678	-	ERAP1-like C-terminal domain
M6	12167232	0.00236624	Nle	NLE (NUC135) domain
M6	15907787	0.00240086	CNOT3	Not1 N-terminal domain, CCR4-Not complex component
M7	14866894	0.00240392	-	septate junction assembly
M5M13	19845921	0.00242466	-	-
M1	1431679	0.00242822	-	Sodium / potassium ATPase beta chain
M4	12941510	0.00243026	ARMC8	Armadillo/beta-catenin-like repeat
M27	3878277	0.0024434	-	Leucyl-tRNA synthetase, Domain 2
M23	2172841	0.00244357	-	proline rich protein
M25	6625766	0.00244801	-	Leucine Rich Repeat
M3	83332	0.00245626	SPOCK3	Secreted protein acidic and rich in cysteine Ca binding region
M7	177255	0.00245678	-	-
M22	10314037	0.00245899	-	Glycosyl-transferase for dystroglycan
M3	9437260	0.00246087	-	Src homology 3 domains
M3	8679761	0.00246414	-	Sugar (and other) transporter
M19	5656193	0.0025017	-	zinc finger
M9	17828570	0.00251078	NEUROG1	helix loop helix domain
M16	429282	0.00251382	-	chitin binding. It is involved in the biological process described with chitin metabolic process
M10	4764407	0.00251521	ABHD5	Alpha/beta hydrolase family
M14	7677634	0.00252559	VMP1	endoplasmic reticulum organization
M23	14996956	0.00254257	ASCC2	CUE domain
M30	4868122	0.00254685	SEC23IP	Metal ion binding
M30	1962426	0.00255022	-	Immunoglobulin I-set domain
M7	12781052	0.00255996	-	Zinc-finger of C2H2 type
M2	21111491	0.00256508	MRPS11	Ribosomal protein S11
M12	4470504	0.00256882	DONSON	Protein downstream neighbor of Son
M5M13	28089618	0.00258518	-	MANEC
M15	3500185	0.00259355	SMG5	PIN domain
M17	12317319	0.00261981	UBR5	E3 ubiquitin ligase EDD
M24	7562590	0.00262189	ZFYVE28	Negative regulator of epidermal growth factor receptor (EGFR) signaling
M1	1532148	0.0026219	ATP1B1	Sodium / potassium ATPase beta chain
M22	1020537	0.00263891	l(2)k09913	Eukaryotic protein of unknown function (DUF829)
M10	16411863	0.00265728	NDUFS3	Respiratory-chain NADH dehydrogenase, 30 Kd subunit
M10	183996	0.00267368	DNAJC2	Ribosome-associated complex head domain
M19	3544955	0.00275272	SACM1L	SacI homology domain
M8	1938856	0.0027715	ZNF318	meiotic cell cycle
M27	3639728	0.00277656	hrg	Poly(A) polymerase central domain
MZ	19259740	0.00279994	FRY	Cell morphogenesis N-terminal
M6	204904	0.00282273	UBR3	Zinc ion binding
M31	5811409	0.00284941	MOGS	Glycosyl hydrolase family 63 N-terminal domain
M22	9878193	0.00285382	AFF4	AF-4 proto-oncoprotein
M6	14923679	0.00285589	-	Alkaline phosphatase homologues
M27	5281021	0.00289747	PHLDB1	positive regulation of basement membrane assembly involved in embryonic body morphogenesis
M12	8198760	0.00291358	TRAK2	Kinesin associated protein
M6	12715013	0.00291804	-	Methuselah N-terminus
M9	17435376	0.00292396	-	Major Facilitator Superfamily
M29	3467162	0.00300431	MYRF	NDT80 / PhoG like DNA-binding family
M16	17416309	0.00300566	BCKDHA	Dehydrogenase E1 component
M5M13	6521987	0.00300597	-	-
M24	2953434	0.00300929	NOP56	NOP5NT (NUC127) domain
M11	2021051	0.0030245	-	zinc finger
M16	123920	0.00303044	-	Sugar (and other) transporter
M17	7692567	0.00303568	ABCF1	ABC transporter
M9	19169597	0.00304964	RpS4	RS4NT (NUC023) domain
M21	4968942	0.00309729	-	Hormone-sensitive lipase (HSL) N-terminus
MZ	24230405	0.00311376	ACADM	Acyl-CoA dehydrogenase, C-terminal domain
M3	10372778	0.00311466	ZMIZ1	MIZ/SP-RING zinc finger
M7	11377038	0.0031174	FSCN1	Fascin domain
M2	18368402	0.00313985
M1	15964185	0.00320686	IFT80	WD40 repeats
M22	13241183	0.00322655	NUB1	Ubiquitin associated domain
M6	12527000	0.00324474	SLMAP	FHA domain
M21	1908701	0.0032663	ANAPC1	complex, subunit
M11	8042100	0.00327911	TTLL12	Tubulin-tyrosine ligase family
M24	9017655	0.00328694	MGEA5	beta-N-acetylglucosaminidase
M8	17930375	0.00332373	ALG5	Glycosyltransferase like family 2
M16	4803776	0.00334144	SMC3	RecF/RecN/SMC N terminal domain
M19	7200374	0.00334533	-	metalloendopeptidase activity. It is involved in the biological process described with proteolysis
M2	6878536	0.00335312	PAAF1	WD domain, G-beta repeat
M5M13	4662780	0.00336568	Atu	Leo1-like protein
M23	12090884	0.00337436	-	5'-nucleotidase, C-terminal domain
M15	15329228	0.0033808	DCAF12	protein modification by small protein conjugation
M18M26	2382977	0.00340011	SMG8	Smg8_Smg9
M3	13281544	0.00340268	CDC5L	pre-mRNA splicing factor component
M9	18144302	0.00344232	NT1	Neurotrophin 1 Source FlyBase
M14	1680690	0.00346943	RPL6	Ribosomal protein L6e
M15	13012157	0.00347795	-	Sugar (and other) transporter
M18M26	4901380	0.0034826	-	Leucine rich repeat C-terminal domain
M3	12426158	0.00350374	TBCD	Tubulin folding cofactor D C terminal
M12	14343975	0.00352411	corn	-
M25	7534293	0.00355381	CCDC113	Domain of unknown function (DUF4201)
M4	6880483	0.00356912	-	endonuclease activity
M12	13426884	0.00357143	KLHDC10	Galactose oxidase, central domain
M29	435843	0.00357918
M6	5953879	0.00364286	SLC7A1	C-terminus of AA_permease
M14	9372619	0.00364543	EIF3C	component of the eukaryotic translation initiation factor 3 (eIF-3) complex, which is involved in protein synthesis of a specialized repertoire of mRNAs and, together with other initiation factors, stimulates binding of mRNA and methionyl-tRNAi to the 40S ribosome. The eIF-3 complex specifically targets and initiates translation of a subset of mRNAs involved in cell proliferation
M6	289331	0.00365437	UBR3	Zinc ion binding
M4	10102389	0.00366764	SLC39A11	Metal ion transmembrane transporter activity. It is involved in the biological process described with metal ion transport
M14	3794283	0.00366972	PPM1D	Serine/threonine phosphatases, family 2C, catalytic domain
M1	13562639	0.00367982	LRRC6	occurring C-terminal to leucine-rich repeats
M30	5182295	0.00368882	MRPS35	Mitochondrial ribosomal subunit protein
M4	5620670	0.00368955	-	RhoGEF domain
M22	709625	0.00371838	UHRF1BP1L	N-terminal region of Chorein or VPS13
M16	6275135	0.00372122	BDH1	Fungal family of unknown function (DUF1776)
M9	12540503	0.00376234	GAK	DnaJ molecular chaperone homology domain
M1	1503401	0.00377874	-	Sodium / potassium ATPase beta chain
M9	9340995	0.00378039	CTNS	Repeated motif present between transmembrane helices in cystinosin, yeast ERS1p, mannose-P-dolichol utilization defect 1, and other hypothetical proteins.
M10	12002259	0.00378065	-	-
M24	6517845	0.00378707	MLH1	DNA mismatch repair protein Mlh1 C-terminus
M27	3039864	0.00380395	CLNS1A	Regulator of volume decrease after cellular swelling
M1	1195995	0.00384756	RCN2	EF-hand domain pair
M10	6721468	0.00388671	IBTK	Tetraspanin family
M11	557575	0.00391137	TMEM179	-
M1	12311016	0.00396556	HADHA	3-hydroxyacyl-CoA dehydrogenase, C-terminal domain
M18M26	16277041	0.0039658	chp	Leucine Rich repeat
M24	6433540	0.00396637	-	Bile acid
M7	12138096	0.00398515	PGS1	Phosphotransferase activity, for other substituted phosphate groups. It is involved in the biological process described with phospholipid biosynthetic process
M12	14132361	0.00398718	TRMT44	Predicted AdoMet-dependent methyltransferase
M24	2801668	0.00399208	EDRF1	nucleic acid-templated transcription
M5M13	3061216	0.00402597
M27	5649585	0.00403798	-	Homeodomain
M15	11303765	0.00407552	LAS1L	Las1-like
M10	9456468	0.00410561	MAD1L1	Mitotic checkpoint protein
M12	9655317	0.00414626	-	WD40 repeats
M1	10810903	0.0041901	TNS3	C2 domain of PTEN tumour-suppressor protein
M27	11112108	0.00421656	-	Tetraspanin family
M27	3660295	0.00422003	-	Zinc finger, C2H2 type
M4	10253655	0.00422424	ZC3H18	Zinc finger C-x8-C-x5-C-x3-H type (and similar)
M19	4370633	0.00424398	-	domain in TBC and LysM domain containing proteins
M19	1959323	0.00429005	CFAP45	Trichohyalin-plectin-homology domain
M2	21224622	0.00429682	RRM2B	Ribonucleotide reductase, small chain
M17	10373579	0.00430785	ABCC4	ABC transporter
M15	2882959	0.00433067	Nmdmc	Tetrahydrofolate dehydrogenase/cyclohydrolase, NAD(P)-binding domain
M1	7696144	0.00433363	-	XK-related protein
M6	12106712	0.00435835	CYP315A1	Cytochrome P450
M17	9129901	0.00436793	-	ATP-grasp domain
M2	15534771	0.00437357	-	Protein of unknown function (DUF3421)
M12	3911829	0.00438991	st	ABC-2 type transporter
M14	1740486	0.00439158	MVK	GHMP kinases N terminal domain
M28	4125898	0.00445532	NFIL3	basic region leucin zipper
M9	16821926	0.0044554	KIF18A	Kinesin motor, catalytic domain. ATPase.
M18M26	19117831	0.00445746	PNPLA8	Patatin-like phospholipase
MZ	21304845	0.00446681	GIGYF1	GYF domain
M17	12394003	0.00446899	TAMM41	Mitochondrial matrix Mmp37
M27	5102558	0.00447154	ECH1	Enoyl-CoA hydratase/isomerase
M25	5796601	0.00448515	-	Chitin-binding domain type 2
M21	4013038	0.00449822	-	-
M29	3620230	0.00453931	DEGS1	Sphingolipid Delta4-desaturase (DES)
M19	1996424	0.00461841	OSGIN2	negative regulation of cell growth
M10	4856328	0.00461927	USP14	Ubiquitin carboxyl-terminal hydrolase
M19	4702391	0.0046478	MED25	Mediator complex subunit 25 von Willebrand factor type A
M3	11373574	0.00467209	CEP290	otic vesicle formation
M3	14791849	0.00468215	DYNC1I2	WD40 repeats
M16	197148	0.00472735	-	Ion channel
M10	4424200	0.00473503	FAF1	FAS-associated factor
M30	2354264	0.00474449	RANGAP1	Leucine Rich repeat
M17	16537971	0.0047925	GPC4	Cell surface proteoglycan that bears heparan sulfate
M18M26	8209088	0.00480021	HPX2	Animal haem peroxidase
M21	10873492	0.00480859	crn-7	Deoxyribonuclease II
M3	11194990	0.00480932	-	-
M30	5002959	0.00484596	OSBPL8	Oxysterol-binding protein
M1	14259506	0.0049225	-	zinc finger
M21	6005416	0.00492316	APLP2	Amyloid A4 N-terminal heparin-binding
M5M13	7408379	0.00493394	HAT1	Histone acetyl transferase HAT1 N-terminus
M14	10270204	0.00496084	ARMC2	Armadillo repeat containing 2
M18M26	12751550	0.0050296	ARMC6	Armadillo repeat-containing protein 6
M21	8641630	0.00512346	-	Mannose-6-phosphate receptor
M15	9444785	0.00514605	-	F-box domain
M14	11788791	0.00521466	POP4	Domain of unknown function UPF0086
M7	6973476	0.00523416	KIAA0195	nucleotide binding
M30	3386261	0.0052689	SLC2A4	Sugar (and other) transporter
M24	154436	0.00527568	GRK6	Extension to Ser/Thr-type protein kinases
M5M13	1283751	0.00527964	USP8	USP8 dimerisation domain
M10	571567	0.00528251	-	GMC oxidoreductase
M8	18493570	0.00528536	PPEF1	Protein phosphatase 2A homologues, catalytic domain.
M9	11019069	0.00532787	SMS	Spermine/spermidine synthase domain
M30	1717032	0.0053287	-	Major Facilitator Superfamily
M19	3153700	0.00535156	RAE1	WD domain, G-beta repeat
M22	13017900	0.00537905	CRAMP1L	chromatin binding
M4	4544217	0.00540842	ARPC1A	Functions as component of the Arp2 3 complex which is involved in regulation of actin polymerization and together with an activating nucleation-promoting factor (NPF) mediates the formation of branched actin networks
M23	11583513	0.00542326	MOXD1	Copper type II ascorbate-dependent monooxygenase, C-terminal domain
M7	7965831	0.00543455	-	Domain of unknown function (DUF4728)
M4	10249684	0.00543726	POP1	POPLD (NUC188) domain
M15	14333221	0.00548599
M20	5041392	0.00548949	Hr39	c4 zinc finger in nuclear hormone receptors
M19	4363962	0.00549887	PSMC5	AAA domain (Cdc48 subfamily)
M28	1328338	0.00550298	-	Nuclear protein MDM1
M11	12118205	0.00551477	ZNF106	WD40 repeats
M23	5470078	0.00552015	RECK	Reversion-inducing cysteine-rich protein with Kazal
MZ	21442655	0.005551
M2	11187064	0.00557921	-	zinc finger
M12	7344010	0.00560768	DEPDC5	negative regulation of TORC1 signaling
M16	17361015	0.00568321	CPOX	Coproporphyrinogen III oxidase
M17	12855292	0.00568952	ANKRD13C	GPCR-chaperone
M7	18918035	0.00569263	SLC26A11	STAS domain
M25	642050	0.00571857
M10	208789	0.00572709	CPSF3	Cleavage and polyadenylation specificity factor
M31	2470029	0.00572897	DVL3	Dishevelled specific domain
M31	1373324	0.00573016	Atp5i	Hydrogen ion transmembrane transporter activity. It is involved in the biological process described with ATP synthesis coupled proton transport
M28	10091094	0.00574681
M12	9617493	0.00578602	-	Belongs to the sodium solute symporter (SSF) (TC 2.A.21) family
M21	8548093	0.00579171	SYMPK	Domain of unknown function (DUF3453)
M9	17968644	0.00580209	-	-
M2	20149660	0.00580792	CSRP2BP	Zinc ion binding
M2	18624678	0.00580887	APBA1	protein localization to membrane
M28	9695884	0.00584748	ort	Belongs to the ligand-gated ion channel (TC 1.A.9) family
M9	12806604	0.00585479	VTA1	Vta1 like
M24	252763	0.00587689	MARS2	tRNA synthetases class I (M)
M9	12348348	0.00588637	dnc	3',5'-cyclic-nucleotide phosphodiesterase activity. It is involved in the biological process described with signal transduction
M21	3320949	0.00588788	-	EGF-like domain
M21	2848556	0.00590281	MAP3K11	Tyrosine kinase, catalytic domain
M16	10661032	0.00591324	-	Major Facilitator Superfamily
M10	6664294	0.00592873	ANKLE1	LEM domain
M1	11879681	0.00595638	zcchc14	zinc finger
M10	4023117	0.00597228	TRPM7	Ion channel activity. It is involved in the biological process described with ion transport
M4	8534560	0.00597444	CLIPA10	Trypsin-like serine protease
M11	15809380	0.00599854	PRELID1	PRELI-like family
M2	8293377	0.00605252	SLCO5A1	Organic Anion Transporter Polypeptide (OATP) family
M15	12952235	0.00608211	-	Sugar (and other) transporter
M7	15804778	0.00611094	TTYH2	Protein tweety homolog
M19	10385340	0.00612622	NSUN2	Belongs to the class I-like SAM-binding methyltransferase superfamily. RsmB NOP family
M8	10236231	0.00613995	-	Sperm-tail PG-rich repeat
M21	3293669	0.00616669	Nep5	Peptidase family M13
M10	5888192	0.00617164	DAB2	Phosphotyrosine-binding domain, phosphotyrosine-interaction (PI) domain
M29	4361157	0.00621353	-	CD36 family
M19	8585172	0.00630628	GPAA1	Gaa1-like, GPI transamidase component
M3	15529603	0.00632202	-	-
M8	4627121	0.00633001	Pld	Phospholipase D. Active site motifs.
M25	5284477	0.00633082	DHFR	Dihydrofolate reductase
M7	6034493	0.00634201	GALK1	Galactokinase galactose-binding signature
M14	12425891	0.00636305	-	-
M22	13911834	0.00637838	LGR4	7 transmembrane receptor (rhodopsin family)
M12	2306009	0.00642325	GIT2	Spa2 homology domain (SHD) of GIT
M10	16272267	0.00643294	-	betaine-homocysteine S-methyltransferase activity
M4	7669251	0.00644894	-	56kDa selenium binding protein (SBP56)
M6	7731239	0.00645254	nanos	Belongs to the nanos family
M31	6553391	0.00645775	CSTF1	Cleavage stimulation factor subunit 1, dimerisation domain
M7	6781335	0.00648727	HEATR2	HEAT repeat-containing protein
M15	7018341	0.00651383	-	Belongs to the fatty acid desaturase type 1 family
M10	11668697	0.00652457	PHAX	PHAX RNA-binding domain
M1	7933526	0.00652596	RB1CC1	Autophagy-related protein 11
M5M13	17234165	0.00655629	CHORDC1	CHORD
M15	14877376	0.00656068	AP3B2	non-SMC mitotic condensation complex subunit 1
M4	11146842	0.00656334	-	Peptide methionine sulfoxide reductase
M1	7706332	0.00659946	DPP10	Dipeptidyl peptidase IV (DPP IV) N-terminal region
M19	2456738	0.0066179	SDE2	Telomere stability and silencing
M8	11701474	0.00662622	CYB5R3	Oxidoreductase FAD-binding domain
M25	8726347	0.00663644	GTPBP4	Involved in the biogenesis of the 60S ribosomal subunit
M6	11887096	0.00668465	XPO6	Exportin 1-like protein
M5M13	13136491	0.00670751	CHAF1B	WD domain, G-beta repeat
M4	2236220	0.00675195	-	7 transmembrane receptor (rhodopsin family)
MZ	26940896	0.00676888	-	Domain of unknown function (DUF4816)
M1	2281073	0.00677862	CWC22	Domain in DAP-5, eIF4G, MA-3 and other proteins.
M5M13	18957812	0.00681149	NID1	Low-density lipoprotein-receptor YWTD domain
M9	5990292	0.00683727	CPE	Carboxypeptidase regulatory-like domain
M14	11723317	0.00693812	MTMR4	Myotubularin-like phosphatase domain
M23	9982089	0.00697824	-	catalytic activity. It is involved in the biological process described with metabolic process
M18M26	800794	0.00698391	SCRB6	CD36 family
M23	16552293	0.00701358	ENKD1	Calmodulin-binding
M12	2183868	0.00709169	WDR66	WD40 repeats
M7	1782939	0.00711277	ECHDC2	Enoyl-CoA hydratase/isomerase
M5M13	22170406	0.00718491	SLC52A3	Protein of unknown function (DUF1011)
M29	7317728	0.00720242	-	Catalyzes the reduction of fatty acyl-CoA to fatty alcohols
M1	20759630	0.00724129	FIS1	Involved in the fragmentation of the mitochondrial network and its perinuclear clustering
M2	10071245	0.00726809	WDR65	WD domain, G-beta repeat
M12	11268245	0.00727928	RTTN	cilium organization
M11	3482687	0.00728061	GNPAT	Phosphate acyltransferases
M8	3000532	0.00736469	TBCK	Domain in Tre-2, BUB2p, and Cdc16p. Probable Rab-GAPs.
M12	10675089	0.007373	POLR3B	DNA-dependent RNA polymerase catalyzes the transcription of DNA into RNA using the four ribonucleoside triphosphates as substrates
M11	11633672	0.00741635	SPAST	ATPase family associated with various cellular activities (AAA)
M14	10142378	0.00742076	POLDIP2	Hemimethylated DNA-binding protein YccV like
M22	8280599	0.00747632	-	tRNA thio-modification
M7	5930771	0.0075231	-	It is involved in the biological process described with
M3	17795567	0.00756243	PDF	Removes the formyl group from the N-terminal Met of newly synthesized proteins
M12	18376966	0.00761829	ZNF407	Zinc finger, C2H2 type
M2	10858071	0.00761979	-	C2H2-type zinc finger
M30	2576703	0.0076347	SKP2	F-box-like
M3	14397957	0.00765033	-	Homologues of snake disintegrins
M27	3417080	0.0076594	-	Kinase-like
M4	14672611	0.00767366	TMF1	TATA element modulatory factor 1 DNA binding
M17	8010261	0.00767948	AFMID	Catalyzes the hydrolysis of N-formyl-L-kynurenine to L- kynurenine, the second step in the kynurenine pathway of tryptophan degradation. Required for elimination of toxic metabolites
M4	6870033	0.00768168	EIF3L	component of the eukaryotic translation initiation factor 3 (eIF-3) complex, which is involved in protein synthesis of a specialized repertoire of mRNAs and, together with other initiation factors, stimulates binding of mRNA and methionyl-tRNAi to the 40S ribosome. The eIF-3 complex specifically targets and initiates translation of a subset of mRNAs involved in cell proliferation
M6	14540667	0.00777921	-	-
M12	4383771	0.00778483	COX10	UbiA prenyltransferase family
M23	13417111	0.00782864	-	-
M2	8507401	0.0078314	-	-
M3	3777574	0.0078957	CCDC12	cwf18 pre-mRNA splicing factor
M6	16204341	0.00793834	RCL1	RNA 3'-terminal phosphate cyclase (RTC), insert domain
M18M26	23234479	0.00795485	MRPL24	Ribosomal proteins 50S L24/mitochondrial 39S L24
M2	17183989	0.00797084	-	MFS_1 like family
M27	5749608	0.00799745	DRAP1	Protein heterodimerization activity
M25	3788675	0.0080067	-	RNA binding
M18M26	13854021	0.00805694	HYAL1	Hyaluronidase
M1	13966493	0.00810353	CYLD	CAP_GLY
M16	16031235	0.00810578	-	-
M18M26	70560	0.00812037	-	zinc finger
M25	7594023	0.00813013	PDK2	Mitochondrial branched-chain alpha-ketoacid dehydrogenase kinase
M11	8014030	0.00813719	RGP1	Rgp1
M14	8289870	0.00813788	UBE2G1	Ubiquitin-conjugating enzyme E2, catalytic domain homologues
M8	18304867	0.00815119	PPFIBP2	It is involved in the biological process described with cell-matrix adhesion
M16	7165084	0.00816824	BIRC2	Zinc ion binding
M31	5187516	0.00819184
M8	20146389	0.00820319	SAP30L	SAP30 zinc-finger
M12	3891493	0.0082521	wht-7	ABC-2 type transporter
M5M13	15666613	0.00825514	-	ATP binding
M4	9719684	0.00827858	ERCC3	Helicase conserved C-terminal domain
M22	9798719	0.0083073	ARID2	ARID/BRIGHT DNA binding domain
MZ	30686669	0.00830992	-	-
M5M13	26054382	0.00832763	PSPC1	NOPS (NUC059) domain
M9	5825915	0.00841675	SYN3	Synapsin, N-terminal domain
M7	12430235	0.00842357	TOP3A	Introduces a single-strand break via transesterification at a target site in duplex DNA. Releases the supercoiling and torsional tension of DNA introduced during the DNA replication and transcription by transiently cleaving and rejoining one strand of the DNA duplex. The scissile phosphodiester is attacked by the catalytic tyrosine of the enzyme, resulting in the formation of a DNA-(5'-phosphotyr…
M21	9165622	0.00846166	-	-
M6	16707789	0.00847447	-	-
M29	2465558	0.00848524	NDUFAF5	Methyltransferase domain
M28	11233941	0.00848748	CADPS2	Domain of Unknown Function (DUF1041)
MZ	21184275	0.00849807	SLC35F6	Sugar proton symporter activity. It is involved in the biological process described with carbohydrate transport
M10	14646040	0.00850629	RTCA	RNA 3'-terminal phosphate cyclase
M18M26	17650657	0.00850777	NUP62	Nsp1-like C-terminal region
M28	10755214	0.00850921	SLC12A9	Amino acid permease
M15	15626645	0.00851493	-	Glycosyl hydrolases family 31
M1	8022297	0.00852724	-	Insulinase (Peptidase family M16)
M31	926637	0.00853254	-	-
M23	12357880	0.00855126	NADK	ATP-NAD kinase
M17	12492429	0.00857802	EIF2A	Eukaryotic translation initiation factor eIF2A
M14	1660247	0.00858124	KIAA1841	Domain of unknown function (DUF3342)
M21	9254690	0.00860272	-	-
M18M26	20240150	0.00866069	RPRD2	RPR
M3	8318318	0.00868632	-	Converts sphingomyelin to ceramide
M31	5129160	0.00874289	PARS2	proline-tRNA ligase activity. It is involved in the biological process described with prolyl-tRNA aminoacylation
M3	13660005	0.00880007	TACR2	Serpentine type 7TM GPCR chemoreceptor Srsx
M1	7310230	0.0088123	trrap	Belongs to the PI3 PI4-kinase family
M3	13311145	0.00881878	FANCM	Type III restriction enzyme, res subunit
M15	15795027	0.00883328	-	Mitochondrial domain of unknown function (DUF1713)
M25	484376	0.00884934	pwn	Calcium-binding EGF domain
M25	120675	0.00887956	C21orf2	occurring C-terminal to leucine-rich repeats
MZ	30467978	0.0089761	SPAG9	JNK-interacting protein leucine zipper II
M8	20673850	0.00899046	CD151	Tetraspanin family
M17	9593215	0.00899548	ZGPAT	glycine rich nucleic binding domain
M12	13412395	0.00903769	ZCWPW1	zinc ion binding
M11	2001663	0.00903991	IFT46	Intraflagellar transport complex B protein 46 C terminal
M1	15477345	0.00904562	-	Chitin-binding domain type 2
M4	6503781	0.00904743	RIOK1	RIO-like kinase
M18M26	12759390	0.00908568	CHMP4B	Snf7
M28	326268	0.00910792	-	C2H2-type zinc finger
M18M26	1838834	0.00911528	-	Sugar (and other) transporter
M25	5294473	0.00915451
M6	1891253	0.00917073	TARBP2	Double-stranded RNA binding motif
M4	17455981	0.00923665	-	1-alkylglycerophosphocholine O-acetyltransferase activity
M6	8458690	0.00927902	-	Gamma-glutamyltranspeptidase
M1	18803055	0.00933538	-	Calcineurin-like phosphoesterase
M22	3994209	0.00934302	ey	sequence-specific DNA binding. It is involved in the biological process described with regulation of transcription, DNA-templated
M7	7019762	0.00935812	ERCC6	SNF2 family N-terminal domain
M6	15366280	0.00939323	-	Zinc finger, C2H2 type
M24	2796134	0.00945533	-	HAUS augmin-like complex subunit 6 N-terminus
M6	5569385	0.0095071	POLR1A	RNA polymerase Rpb1, domain 5
M23	6791462	0.00952093	MAP3K7	Protein tyrosine kinase
M2	10699512	0.00958698	PFKL	Catalyzes the phosphorylation of D-fructose 6-phosphate to fructose 1,6-bisphosphate by ATP, the first committing step of glycolysis
M24	10651367	0.00962372	-	Protein of unknown function (DUF1676)
M14	7630804	0.00969636	SUPT3H	Transcription initiation factor IID, 18kD subunit
M6	15627795	0.0097158	NPRL2	Nitrogen permease regulator 2
M6	16011177	0.00971673	VARS	tRNA synthetases class I (I, L, M and V)
M11	5686055	0.00972098	-	Domain of unknown function (DUF4508)
M6	17182869	0.00973233	UBA1	Ubiquitin-activating enzyme e1 C-terminal domain
M18M26	19155514	0.00978405	FRRS1	Possible catecholamine-binding domain present in a variety of eukaryotic proteins.
M10	7607537	0.0097971
M6	13280300	0.00980108	MLST8	WD domain, G-beta repeat
M18M26	22779359	0.00985945	C21orf59	Protein of unknown function (DUF2870)
M11	9722569	0.00986981	-	Zn_pept
M5M13	16494338	0.00989012	-	Cadherin repeats.
M10	4747294	0.00999552	ORC1	Origin recognition complex subunit

## Sheet: TableS5
Supplementa Table S5 GO enrichment of top 219 positively selected genes in Tortricidae. Only terms with Top 20 were shown. MF, Molecular Fundtion; CC, Cellular component; BP, Biological process
Class	GO_Name	Q_value	-log(Q)	Enrichmen Score
MF	protein binding	0.00168031	2.77461	1.36539
MF	guanyl-nucleotide exchange factor activity	0.00382213	2.41769	4.89895
MF	GTPase regulator activity	0.0125061	1.90288	3.19772
MF	nucleoside-triphosphatase regulator activity	0.0377107	1.42354	2.82309
MF	lipid binding	0.0379	1.42136	2.55746
MF	binding	0.0393991	1.40451	1.16233
MF	integrin binding	0.0362606	1.44056	5.9975
MF	cell adhesion molecule binding	0.032374	1.4898	3.9304
MF	enzyme regulator activity	0.035022	1.45566	2.03689
MF	phospholipid binding	0.040939	1.38786	2.93356
MF	ATP hydrolysis activity	0.0476055	1.32234	2.399
CC	plasma membrane bounded cell projection	0.0193792	1.71267	1.81319
CC	cell projection	0.0124213	1.90583	1.79528
CC	cytoplasm	0.00929412	2.03179	1.20163
CC	obsolete plasma membrane bounded cell projection part	0.0334781	1.47524	1.86322
CC	obsolete cell projection part	0.0334781	1.47524	1.86322
CC	obsolete neuron part	0.0291569	1.53526	1.75921
CC	obsolete ciliary part	0.040121	1.39663	2.66659
CC	neuron projection	0.0386912	1.41239	1.82331
BP	cell morphogenesis	0.000576351	3.23931	2.27828
BP	neuron projection morphogenesis	0.000494537	3.3058	2.48105
BP	plasma membrane bounded cell projection morphogenesis	0.000382479	3.41739	2.46622
BP	cell projection morphogenesis	0.000308811	3.51031	2.45886
BP	plasma membrane bounded cell projection organization	0.000504043	3.29753	1.99959
BP	cell projection organization	0.000493111	3.30706	1.98917
BP	cell morphogenesis involved in neuron differentiation	0.0010428	2.9818	2.40065
BP	axonogenesis	0.0016357	2.7863	2.57682
BP	axon development	0.00150823	2.82153	2.51721
BP	cytoskeleton organization	0.00240953	2.61807	2.0832
BP	digestive system development	0.00251941	2.5987	3.68487
BP	positive regulation of cytoskeleton organization	0.0027466	2.5612	4.74109
BP	regulation of biological process	0.0031048	2.50797	1.25887
BP	positive regulation of developmental process	0.00308937	2.51013	2.08577
BP	neuron projection development	0.00330715	2.48055	2.04649
BP	kinetochore organization	0.00315785	2.50061	15.2768
BP	cellular anatomical entity morphogenesis	0.0030809	2.51132	2.04169
BP	biological regulation	0.00396043	2.40226	1.22768
BP	gonad development	0.00547406	2.26169	3.31805
BP	development of primary sexual characteristics	0.00549869	2.25974	3.3031

## Sheet: TableS6
Supplementa Table S6 GO enrichment of 46 positively selected genes on M17 in Tortricidae. MF, Molecular Function; CC, Cellular component; BP, Biological process
Class	GO_Name	Q_value	-log(Q)	Enrichment Score
MF	GTPase binding	0.294818	0.530446	3.89448
MF	small GTPase binding	0.210492	0.676764	3.91993
CC	intracellular organelle	0.29254	0.533814	1.16588
CC	membrane-bounded organelle	0.353496	0.451615	1.17015
CC	organelle	0.331315	0.479759	1.15156
CC	intracellular membrane-bounded organelle	0.363684	0.439276	1.16767
BP	positive regulation of Wnt signaling pathway	0.0857096	1.06697	12.381
BP	regulation of Wnt signaling pathway	0.141281	0.849917	7.25581
BP	regulation of canonical Wnt signaling pathway	0.140175	0.853331	7.93893
BP	canonical Wnt signaling pathway	0.191935	0.716845	6.88742
BP	Wnt signaling pathway	0.172316	0.763675	5.4026
BP	biological regulation	0.316074	0.500211	1.3228
BP	regulation of biological process	0.346603	0.460168	1.33168
BP	positive regulation of biological process	0.336423	0.473114	1.49487
BP	positive regulation of cellular process	0.294523	0.530881	1.50725
BP	positive regulation of cell communication	0.325114	0.487965	2.11048
BP	positive regulation of signaling	0.32689	0.485599	2.10574
BP	regulation of peptide transport	0.319536	0.49548	2.88089
BP	cellular response to organic cyclic compound	0.293674	0.532135	2.84932
BP	negative regulation of cell population proliferation	0.299485	0.523624	2.81843
BP	metabolic process	0.301953	0.520061	1.20484
BP	positive regulation of gene expression	0.306537	0.513517	1.85383
BP	epithelial tube morphogenesis	0.315544	0.50094	2.35917
BP	regulation of cellular process	0.334692	0.475355	1.2587
BP	amide transport	0.318213	0.497282	1.88141
BP	positive regulation of macromolecule metabolic process	0.327791	0.484403	1.60095
BP	secretion by cell	0.329677	0.481911	2.07112

## Sheet: TableS7
Supplementa Table S7 Tests for the difference in number of outliers detected using RAiSD
Merain elements	Num of outliers (top 1‰)	Sequence length	Standardized residual by sequence length	Chi-squred test against non-self part
M20	13	6330	-0.387336	X-squared = 174.32, df = 1, p-value < 2.2e-16
M17	597	12545	1.42735	X-squared = 46.888, df = 1, p-value = 7.517e-12
MZ	178	17083	-2.23103	X-squared = 194.17, df = 1, p-value < 2.2e-16
M(5+13)	851	28235.4	-1.18484	X-squared = 1.2097, df = 1, p-value = 0.2714
M(18+26)	766	24417.5	-0.68595	X-squared = 0.1106, df = 1, p-value = 0.7395
M8	1104	23148	1.6389	X-squared = 62.471, df = 1, p-value = 2.704e-15
M2	773	21734.4	0.0580437	X-squared = 3.6988, df = 1, p-value = 0.05445
M1	1076	20943	2.05136	X-squared = 87.308, df = 1, p-value < 2.2e-16
M12	673	19448.6	0.0672366	X-squared = 1.878, df = 1, p-value = 0.1706
M3	620	19335.7	-0.215593	X-squared = 0.0001074, df = 1, p-value = 0.9917
M9	428	19234.8	-1.32094	X-squared = 33.229, df = 1, p-value = 8.19e-09
M7	510	18985.9	-0.772394	X-squared = 8.3078, df = 1, p-value = 0.003947
M16	734	18803.3	0.595823	X-squared = 12.896, df = 1, p-value = 0.0003293
M6	488	18245	-0.708016	X-squared = 8.508, df = 1, p-value = 0.003536
M4	353	17856.4	-1.40203	X-squared = 52.525, df = 1, p-value = 4.248e-13
M23	906	17419.1	1.97222	X-squared = 85.767, df = 1, p-value < 2.2e-16
M21	596	17363.7	0.159403	X-squared = 1.4089, df = 1, p-value = 0.2352
M22	654	17192.4	0.546153	X-squared = 9.2037, df = 1, p-value = 0.002415
M15	639	16869.3	0.542361	X-squared = 8.6527, df = 1, p-value = 0.003266
M10	576	16751.5	0.201857	X-squared = 1.4546, df = 1, p-value = 0.2278
M11	609	16519.7	0.457084	X-squared = 5.9237, df = 1, p-value = 0.01494
M14	582	14830.3	0.740398	X-squared = 12.098, df = 1, p-value = 0.0005048
M24	437	13750	0.168614	X-squared = 0.0052011, df = 1, p-value = 0.9425
M19	306	12568.5	-0.294127	X-squared = 14.95, df = 1, p-value = 0.0001104
M28	292	12130.2	-0.26187	X-squared = 15.728, df = 1, p-value = 7.313e-05
M27	167	11473.8	-0.826778	X-squared = 85.236, df = 1, p-value < 2.2e-16
M25	110	9443.79	-0.631085	X-squared = 103.23, df = 1, p-value < 2.2e-16
M31	359	8812.23	1.00208	X-squared = 12.807, df = 1, p-value = 0.0003453
M30	100	8578.47	-0.463396	X-squared = 94.891, df = 1, p-value < 2.2e-16
M29	129	8391.58	-0.243507	X-squared = 59.238, df = 1, p-value = 1.397e-14

## Sheet: TableS8
Supplementa Table S8 Positively selected genes detected in Grapholita molesta using RAiSD
Merain element	Positation_Start	Gene	Gene destription
M17	10373579	ABCC4	ABC transporter
M17	13886673	-	mRNA binding
M17	14693002	PPIE	PPIases accelerate the folding of proteins
M17	15346190	-	7 transmembrane receptor (rhodopsin family)
M17	15929575	TMBIM4	Inhibitor of apoptosis-promoting Bax1
M17	17577312	Ces3	Carboxylesterase family
M17	17874365	NLG-1	Carboxylesterase family
M17	17932953	-	Transposase protein
MZ	26147559	-	ATP binding
MZ	26308589	-	EF-hand calcium-binding domain-containing protein
MZ	32179818	-	Transposase IS4
MZ	35856905	-	transposition RNA-mediated
M5M13	1161469	-	positive regulation of protein homodimerization activity
M5M13	2132501	BBS5	Bardet-Biedl syndrome 5 protein
M5M13	7321784	-	Insect cuticle protein
M5M13	9811094	DLC1	GTPase-activator protein for Rho-like GTPases
M5M13	13346054	STIP1	Heat shock chaperonin-binding motif.
M18M26	13039487	-	Catalase
M18M26	15405863	CROCC	Ciliary rootlet component centrosome cohesion
M18M26	23548787	CWC27	Domain of unknown function (DUF4792)
M8	134741	-	Pao retrotransposon peptidase
M8	15591066	MAK16	Mak16 protein C-terminal region
M8	23055138	-	GMC oxidoreductase
M8	20994743	P450	Cytochrome P450
M8	20999560	P450	Cytochrome P450
M8	22141015	P450	Cytochrome P450
M8	22331816	P450	Cytochrome P450
M2	30857	-	Ribonuclease H protein
M2	4560180	-	C-type lectin (CTL) or carbohydrate-recognition domain (CRD)
M2	12212710	-	DDE superfamily endonuclease
M2	14537694	-	Adenylyl cyclase N-terminal extracellular and transmembrane region
M1	2632511	DYRK4	Phosphotransferase enzyme family
M1	3879845	CTSL	cysteine-type endopeptidase activity
M1	9573170	NDUFS6	Zinc-finger domain
M1	13742203	HYDIN	axonemal central apparatus assembly
M1	16696394	CPR59	Insect cuticle protein
M1	16834410	-	zinc finger
M12	5085259	MFNG	Fringe-like
M12	9655317	-	WD40 repeats
M12	9742248	dp	Epidermal growth factor-like domain.
M12	14760774	NLK	Serine threonine kinase NLK
M3	8625521	-	Major Facilitator Superfamily
M3	11241028	ABI2	Abl-interactor HHR
M7	1834587	THSD7A	Thrombospondin type 1 repeats
M7	5411755	ADGB	calcium-dependent cysteine-type endopeptidase activity
M16	1846827	CES5A	Carboxylesterase family
M16	5858276	-	transposition RNA-mediated
M16	6726705	-	Pao retrotransposon peptidase
M6	3465943	-	Insect cuticle protein
M6	8364693	RAD50	AAA domain
M6	13990721	DEF6	PH domain
M4	3300145	DHX38	ATP-dependent helicase activity
M4	16019584	GNBP3	Carbohydrate binding domain (family 32)
M23	2110616	DLG5	Guanylate kinase
M23	2840801	-	Pao retrotransposon peptidase
M23	6026873	-	BEN
M23	7788460	SPOCD	SPOC domain
M21	980804	-	A-kinase anchor protein 2 C-terminus
M21	1908701	ANAPC1	complex subunit
M22	512688	PACSIN3	Fes/CIP4 homology domain
M22	17155781	-	zinc finger
M10	1789813	RPAP3	Potential Monad-binding region of RPAP3
M10	7639527	goa-1	GTP binding
M10	13452427	-	Adenylyl- / guanylyl cyclase catalytic domain
M10	14465104	Tep6	endopeptidase inhibitor activity
M11	3641095	-	Ubiquitin carboxyl-terminal hydrolase
M11	7507252	-	Pyridoxal-phosphate dependent enzyme
M11	8800406	MTA1	MTA R1 domain
M14	12347158	-	7tm Odorant receptor
M14	10220793	DHRS11	Enoyl-(Acyl carrier protein) reductase
M24	6673967	-	Pao retrotransposon peptidase
M28	5552226	-	Protein of unknown function (DUF1759)
M27	9403272	PTGR1	N-terminal domain of oxidoreductase
M25	1347820	-	ATP synthase subunit D
M31	1913050	ARID5B	GM013481
M31	3383956	HIST2H3A	Core histone H2A/H2B/H3/H4
M31	3383956	HIST2H3A	Core histone H2A/H2B/H3/H4
M29	7970622	pgp-2	ABC transporter transmembrane region
